# Supplementary material for: Rationale and study design of the Prospective comparison of Angiotensin Receptor neprilysin inhibitor with Angiotensin receptor blocker MEasuring arterial sTiffness in the eldERly (PARAMETER) study
Source: PubMed Central journal article supplement — BMJ Open. 2014 Feb 4;4(2):e004254. doi: 10.1136/bmjopen-2013-004254 (PMC3918996; doi:10.1136/bmjopen-2013-004254), 2014-02-04
Supplement: bmjopen-2013-004254.draft_revisions.pdf [file bmjopen-2013-004254.draft_revisions.pdf]

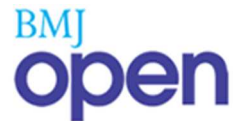

**Rationale and study design of the Prospective comparison  
of Angiotensin Receptor neprilysin inhibitor with  
Angiotensin receptor blocker MEasuring arterial sTiffness in  
the eldERly (PARAMETER) study**

|                                 |                                                                                                                                                                                                                                                                                                                                                                                                                                                                                                                                                                            |
|---------------------------------|----------------------------------------------------------------------------------------------------------------------------------------------------------------------------------------------------------------------------------------------------------------------------------------------------------------------------------------------------------------------------------------------------------------------------------------------------------------------------------------------------------------------------------------------------------------------------|
| Journal:                        | <i>BMJ Open</i>                                                                                                                                                                                                                                                                                                                                                                                                                                                                                                                                                            |
| Manuscript ID:                  | bmjopen-2013-004254                                                                                                                                                                                                                                                                                                                                                                                                                                                                                                                                                        |
| Article Type:                   | Protocol                                                                                                                                                                                                                                                                                                                                                                                                                                                                                                                                                                   |
| Date Submitted by the Author:   | 15-Oct-2013                                                                                                                                                                                                                                                                                                                                                                                                                                                                                                                                                                |
| Complete List of Authors:       | Williams, Bryan; University College London, Institute of Cardiovascular Science;<br>Cockroft, John; University of Cardiff, Cardiology<br>Kario, Kazuomi; Jichi Medical University School of Medicine, Medicine<br>Zappe, Dion; Novartis Pharmaceuticals Corporation, Clinical Medicine<br>Cardenas, Pamela; Novartis Pharmaceuticals Corporation, Clinical Medicine<br>Hester, Robert; Novartis Pharmaceuticals Corporation, IIS/PC Franchise<br>Brunel, Patrick; Novartis Pharma AG, Clinical Medicine<br>Zhang, Jack; Beijing Novartis Pharma Co. Ltd, Clinical Medicine |
| <b>Primary Subject Heading</b>: | Cardiovascular medicine                                                                                                                                                                                                                                                                                                                                                                                                                                                                                                                                                    |
| Secondary Subject Heading:      | Pharmacology and therapeutics                                                                                                                                                                                                                                                                                                                                                                                                                                                                                                                                              |
| Keywords:                       | Hypertension < CARDIOLOGY, Vascular medicine < INTERNAL MEDICINE,<br>Cardiology < INTERNAL MEDICINE                                                                                                                                                                                                                                                                                                                                                                                                                                                                        |
|                                 |                                                                                                                                                                                                                                                                                                                                                                                                                                                                                                                                                                            |

SCHOLARONE™  
Manuscripts

1  
2  
3 **Rationale and study design of the Prospective comparison of Angiotensin Receptor**  
4 **neprilysin inhibitor with Angiotensin receptor blocker MEasuring arterial sTiffness in the**  
5 **eldERly (PARAMETER) study**  
6  
7  
8  
9

10 Bryan Williams,<sup>1</sup> John R. Cockcroft,<sup>2</sup> Kazuomi Kario,<sup>3</sup> Dion H. Zappe,<sup>4</sup> Pamela Cardenas,<sup>4</sup>  
11  
12 Allen Hester,<sup>4</sup> Patrick Brunel,<sup>5</sup> Jack Zhang<sup>4</sup>  
13  
14

15 <sup>1</sup>Department of Cardiovascular Sciences, University College of London, London, UK;

16  
17 <sup>2</sup>Department of Cardiology, University of Cardiff, Wales, UK; <sup>3</sup>Jichi Medical School, Tochigi,  
18 Japan; <sup>4</sup>Novartis Pharmaceuticals Corporation, East Hanover, New Jersey, USA; <sup>5</sup>Novartis  
19 Pharma AG, Basel, Switzerland  
20  
21  
22  
23  
24

25 **Corresponding Author:**

26 Bryan Williams MD FRCP FAHA FESC

27 Professor of Medicine

28  
29  
30 Director; National Institute for Health Research (NIHR) University College London Hospitals  
31 Biomedical Research Centre

32 Institute of Cardiovascular Science

33 University College London

34 170 Tottenham Court Road

35 W1T 7HA

36 London

37 United Kingdom

38 Phone number: +442031082357

39 E-mail [bryan.williams@ucl.ac.uk](mailto:bryan.williams@ucl.ac.uk)  
40  
41  
42  
43  
44  
45  
46  
47

48 **Key words:** arterial stiffness, central aortic systolic pressure, isolated systolic hypertension,  
49 pulse pressure, LCZ696, elderly  
50  
51  
52  
53

54 **Word count:** 3920 words excluding title page, abstract, references, tables, and figures  
55  
56  
57  
58  
59  
60

## ABSTRACT

**Background:** Hypertension in elderly people is characterised by elevated systolic blood pressure (SBP) and increased pulse pressure (PP), which indicate large artery ageing and stiffness. LCZ696, a first-in-class angiotensin receptor neprilysin inhibitor (ARNI), is currently being developed for the treatment of hypertension and heart failure. The Prospective comparison of Angiotensin Receptor neprilysin inhibitor with Angiotensin receptor blocker MEasuring arterial sTiffness in the eldERly (PARAMETER) study will assess the efficacy of LCZ696 versus olmesartan on aortic stiffness and central aortic haemodynamics.

**Design and methods:** In this 52-week multicentre study, patients with hypertension aged  $\geq 60$  years with a mean seated (ms) SBP  $\geq 150$ – $<180$ mmHg and a PP  $>60$ mmHg will be randomised to once-daily LCZ696 200mg or olmesartan 20mg for 4 weeks, followed by a forced-titration to double the initial doses for the next 8 weeks. At 12–24 weeks, if the BP target has not been attained (msSBP  $<140$ mmHg and ms diastolic blood pressure  $<90$  mmHg), amlodipine (2.5–5mg) and subsequently hydrochlorothiazide (6.25–25mg) can be added. The primary and secondary endpoints are changes from baseline in central aortic systolic pressure (CASP) and central aortic PP (CAPP) at Week 12, respectively. Other secondary endpoints are the changes in CASP and CAPP at Week 52.

**Statistical analysis plan:** A sample size of 432 randomised patients is estimated to ensure a power of 90% to assess the superiority of LCZ696 over the olmesartan at Week 12 in the change from baseline of mean CASP, assuming a standard deviation of 19mmHg, the difference of 6.5mmHg and a 15% dropout rate. The primary variable will be analysed using a two-way analysis of covariance.

**Progress and implications:** The study was initiated in December 2012 and final results are expected in 2015. The results of this study will impact the design of future phase III studies assessing cardiovascular protection.

**Clinical trials identifier:** EUDract number 2012-002899-14 and ClinicalTrials.gov NCT01692301.

1  
2  
3 **Key words:** arterial stiffness, central aortic systolic pressure, isolated systolic hypertension,  
4 pulse pressure, LCZ696, elderly  
5  
6  
7  
8  
9

## 10 **Strengths and Weaknesses of this Study**

### 11 **Strengths:**

- 12 • This is a randomized controlled trial of a new class of drug therapy (angiotensin  
13 receptor neprilysin inhibitor – ARNI) for hypertension versus a comparator that  
14 blocks only the angiotensin receptor – this will inform on the added value of  
15 neprilysin inhibition in the context of systolic hypertension;  
16 • The study incorporates a detailed clinical experimental medicine mechanistic  
17 study that will interrogate the actions of this new drug class on vascular  
18 haemodynamics and function;  
19 • The study evaluates the a novel treatment approach for a major unmet clinical  
20 need, i.e. systolic hypertension  
21  
22  
23  
24  
25  
26

### 27 **Weaknesses**

- 28 • The study has inadequate statistical power to assess the impact of the  
29 interventions on major clinical outcomes beyond blood pressure and vascular  
30 haemodynamics and function.  
31  
32  
33  
34  
35  
36  
37  
38  
39  
40  
41  
42  
43  
44  
45  
46  
47  
48  
49  
50  
51  
52  
53  
54  
55  
56  
57  
58  
59  
60

## INTRODUCTION

Hypertension accounts for 9.4 million cardiovascular (CV) deaths annually worldwide and is affecting more than two-thirds of people aged  $\geq 65$  years, an age group that is growing globally.<sup>1,2</sup> The treatment of hypertension has been shown to reduce the risk of morbidity and mortality associated with elevated blood pressure (BP) including stroke, ischaemic heart disease, heart failure, chronic kidney disease and possibly cognitive decline.<sup>3</sup> Despite the availability of multiple drug classes with different mechanisms of action, hypertension, especially systolic blood pressure (SBP), remains inadequately controlled.<sup>4</sup>

The SBP usually increases from childhood throughout the life, while diastolic BP (DBP) remains relatively constant or decreases beyond 50 to 60 years of age. This indicates that the worldwide burden of hypertension beyond 50 to 60 years is mostly due to systolic hypertension. Furthermore, the progressive increase in SBP and decrease or no change in DBP widens pulse pressure (PP), and results in the development of isolated systolic hypertension (ISH), which is the predominant form of hypertension in elderly patients. The National Health and Nutrition Examination Survey (NHANES) III reported that the prevalence of ISH was 87% in elderly patients with hypertension.<sup>5</sup> Furthermore, the Framingham Heart Study (FHS) reported almost a 90% lifetime risk of developing ISH in normotensive people reaching the age of 65 years and who survived for another 20 to 25 years.<sup>6</sup>

The changing patterns of BP throughout the life reflect different pathologies. In the young, hypertension is predominantly due to an increased DBP and mean arterial pressure (MAP), as a result of a relative increase in cardiac output and/or increased peripheral vascular resistance.<sup>7</sup> On the other hand, advancing age, beyond mid-life, is associated with an increased stiffness of large elastic arteries, especially the aorta. Arterial stiffening adversely affects the characteristic impedance of the aorta, requiring more cardiac work and raising SBP as more stroke volume is delivered during systole owing to the increased pulse wave velocity (PWV). DBP also decreases due to less elastic recoil leading to reduced flow, thus increasing PP independent of any changes in MAP. PWV been shown to be an independent predictor of CV outcomes, including mortality,<sup>8</sup> myocardial infarction (MI),<sup>8</sup> stroke,<sup>8</sup> atrial fibrillation,<sup>9</sup> cognitive decline<sup>10</sup> and renal dysfunction<sup>11</sup> and more specifically aortic PWV

1  
2  
3 (aPWV), a robust measure of aortic arterial stiffness, has been shown to predict the adverse  
4 CV outcomes.<sup>7</sup>  
5  
6

7  
8 Another consequence of arterial ageing and stiffening is that the amplification of SBP and PP  
9 from the aortic root to the peripheral arteries diminishes. In a healthy arterial system, central  
10 aortic systolic pressure (CASP) and PP are amplified as they move towards the periphery,  
11 such that the measured brachial systolic pressure is typically around 10 mm Hg higher than  
12 the corresponding aortic root pressure<sup>12</sup>. With ageing, this amplification is reduced because  
13 of the increased PWV and the increase in the early wave reflection resulting in the measured  
14 brachial SBP and PP becoming closer to the corresponding aortic root pressures. Some  
15 studies have suggested that central pressures may have a closer correlation than peripheral  
16 BP with end organ damage<sup>13-15</sup> and CV risk,<sup>15</sup> such as extent of coronary atherosclerosis,  
17 carotid intima-media thickness, left ventricular hypertrophy, and left ventricular diastolic  
18 function.<sup>14,16,17</sup>  
19  
20  
21  
22  
23  
24  
25  
26  
27

28 These observations raise the intriguing question as to whether treatments used to lower blood  
29 pressure could differentially affect aortic relative to brachial pressures and also arterial  
30 stiffness per se. It has been demonstrated that BP-lowering drugs can have marked  
31 differential effects on central aortic pressure (CAP) and brachial BP.<sup>18</sup> These effects mimic a  
32 functional anti-ageing effect in terms of their impact on wave-form morphology, and greater  
33 reduction in central pressures relative to brachial pressures. Intriguingly, the beta-blockers, a  
34 drug class which was least effective at lowering aortic pressure also appeared to be the least  
35 effective class at reducing the risk of stroke in elderly patients.<sup>18</sup> This supports the concept  
36 that the more effective lowering of aortic relative to brachial pressure may be clinically  
37 important.  
38  
39  
40  
41  
42  
43  
44  
45

46 Despite the findings cited above, controlling SBP remains the most important unmet need in  
47 the clinical management of hypertension. The rise in SBP and PP with ageing appears to be  
48 strongly related to arterial stiffening and increased impedance to flow through a stiff aorta.  
49 This suggests that the treatments targeting aortic stiffening and reducing characteristic  
50 impedance would be effective particularly at reducing systolic pressure. Early proof of this  
51 concept came from the studies with omapatrilat, a vasopeptidase inhibitor that  
52 simultaneously inhibits neprilysin and angiotensin-converting enzyme (ACE). Neprilysin  
53  
54  
55  
56  
57  
58  
59  
60

1  
2  
3 inhibition enhances natriuretic peptide (NP) levels by blocking their degradation. NP has  
4 vasodilating actions, which could reduce aortic stiffness, improve characteristic impedance  
5 and thereby reduce SBP and PP. Studies with omapatrilat show greater improvements in  
6 aortic characteristic impedance compared with enalapril, beyond the effects of BP-lowering  
7 after 12 weeks of therapy.<sup>19</sup> This benefit on aortic function was also associated with  
8 impressive data on SBP and PP lowering in patients with hypertension. Despite this  
9 considerable promise, omapatrilat was withdrawn due to safety concerns owing to increased  
10 incidences of angio-oedema associated with the ACE-inhibitor component, which was  
11 seemingly potentiated by the neprilysin inhibition.  
12  
13  
14  
15  
16  
17  
18  
19

20 Nevertheless, a proof of concept was established for concomitant inhibition of neprilysin and  
21 renin-angiotensin-aldosterone system (RAAS) with the potential to be an attractive treatment  
22 strategy to improve aortic haemodynamics. Furthermore, there might be other benefits of  
23 neprilysin inhibition in the setting of hypertension, beyond its vasodilator action. Increased  
24 NP levels also promote natriuresis and reduce sympathetic tone, together with  
25 antiproliferative and antihypertrophic effects, and inhibition of aldosterone secretion.<sup>20</sup>  
26  
27 Alongside, suppression of RAAS would be complementary to neprilysin inhibition, which  
28 attenuates vasoconstriction, reduces sodium and water retention and also inhibits the  
29 development of CV hypertrophy and adverse re-modelling.  
30  
31  
32  
33  
34  
35  
36

37 Recently LCZ696, a first-in-class angiotensin receptor neprilysin inhibitor (ARNI), has been  
38 developed. LCZ696 delivers systemic exposure to a neprilysin inhibitor prodrug, AHU377  
39 (which rapidly converts into active LBQ657), and an angiotensin receptor blocker (ARB),  
40 valsartan. LCZ696 at 100, 200 and 400 mg once daily, in patients with mild-to-moderate  
41 essential hypertension, resulted in greater BP reductions than corresponding doses of  
42 valsartan alone (160 and 320 mg) and was well tolerated.<sup>21</sup> LCZ696 compared with valsartan  
43 was effective especially at reducing brachial SBP and PP. Furthermore, in patients with heart  
44 failure with preserved ejection fraction, LCZ696 has shown to reduce N-terminal-pro B-type  
45 natriuretic peptide (NT-proBNP), a biomarker of left ventricular (LV) wall stress, to a greater  
46 extent than valsartan alone at 12 weeks and was well tolerated.<sup>22</sup>  
47  
48  
49  
50  
51  
52  
53  
54

55 Thus, the big challenge in hypertension treatment is to reduce the SBP, and the available  
56 evidence suggests that this could be achieved by improving the haemodynamic performance  
57  
58  
59  
60

1  
2  
3 of the ageing aorta. The Prospective comparison of Angiotensin Receptor neprilysin inhibitor  
4 with Angiotensin receptor blocker MEasuring arterial sTiffness in the elderLy  
5 (PARAMETER) study is designed to compare the effect of LCZ696 with olmesartan, an  
6 ARB, on CASP, other measures of central aortic haemodynamics and arterial stiffness, and  
7 ambulatory blood pressures in elderly patients with an elevated brachial SBP and a widened  
8 PP. The widened PP was chosen as an entry criteria as being indicative of aortic stiffening  
9 and advanced aortic ageing. The objective is to determine whether the ARNI LCZ696 can  
10 reverse some of the effects of arterial ageing in elderly patients with systolic hypertension,  
11 and thereby improve aortic pressures and haemodynamics. The study was initiated in  
12 December 2012 and the final results are expected in 2015. This manuscript describes the  
13 design, objectives and pre-specified analysis plan for the PARAMETER study.  
14  
15  
16  
17  
18  
19  
20  
21  
22  
23  
24  
25  
26  
27  
28  
29  
30  
31  
32  
33  
34  
35  
36  
37  
38  
39  
40  
41  
42  
43  
44  
45  
46  
47  
48  
49  
50  
51  
52  
53  
54  
55  
56  
57  
58  
59  
60



## METHODS

### Study design

The PARAMETER study is a 52-week, multicentre, randomised, double-blind, active-controlled, parallel-group study, involving 51 centres from 13 countries (Europe 47%, South America 14%, Asia 19% and US 20% — see online supplement for list of local investigators and participating centres). The study includes a screening period, a placebo run-in, and an initial double-blind treatment period of 12 weeks with LCZ696 monotherapy, followed by a double-blind extension of 40 weeks, during which add-on therapy is allowed to reach the BP treatment goal. Patients will be randomised to receive either once-daily LCZ696 200 mg or olmesartan 20 mg for 4 weeks, followed by a forced-titration to double the initial doses for the next 8 weeks. After 12 weeks, patients with uncontrolled BP (mean sitting [ms] SBP >140 mm Hg and/or msDBP >90 mm Hg) will be prescribed amlodipine (2.5–5 mg) and then hydrochlorothiazide (6.25–25 mg) as needed, at an interval of 4 weeks up to Week 24 (Figure 1). This study has been approved by all relevant ethics committees. The study is registered as EUDract number 2012-002899-14 and on ClinicalTrials.gov under the code NCT01692301.

### Study participants

Elderly patients (aged  $\geq 60$  years) with essential hypertension (either untreated or treated with antihypertensive agents) and patients who have msSBP  $\geq 150$  mm Hg and  $< 180$  mm Hg at randomisation are eligible for inclusion in the study. Untreated patients (if they are newly diagnosed or have not been treated with antihypertensive drugs for the 4 weeks prior to screening) must have msSBP  $\geq 150$  mm Hg and  $< 180$  mm Hg at screening and randomisation, whereas patients who have been treated with antihypertensive agents 4 weeks prior to screening must have msSBP  $\geq 140$  mm Hg and  $< 180$  mm Hg after 1 or 2 weeks of washout/placebo run-in and  $\geq 150$  mm Hg and  $< 180$  mm Hg at randomisation. All patients must have a PP  $> 60$  mm Hg at randomisation. Patients with malignant or severe hypertension, secondary causes of hypertension, history of atrial fibrillation or atrial flutter during the 3 months prior to screening, or active atrial fibrillation or atrial flutter on electrocardiogram, history of CV disease (e.g., myocardial infarction) during 12 months prior to screening, and

1  
2  
3 evidence of severe renal impairment (e.g., estimated glomerular filtration rate [eGFR] <30  
4 ml/min/1.73 m<sup>2</sup>) are excluded – boxes 1 and 2 summarise the inclusion and exclusion  
5 criteria, respectively. Patients have to provide a written informed consent before starting any  
6 study-related procedures.  
7  
8  
9

### 10 11 **The study objectives and endpoints**

12  
13  
14 The primary objective of the study is to demonstrate the superiority of a LCZ696-based  
15 treatment regimen over an olmesartan-based treatment regimen in reducing mean CASP after  
16 12 weeks of treatment. Superiority testing is also planned for the key secondary efficacy  
17 assessment, i.e. the reduction in mean central aortic PP (CAPP) after 12 weeks of treatment,  
18 and other secondary efficacy assessments such as mean CASP and CAPP after 52 weeks of  
19 treatment. Mean aPWV, msSBP, msDBP, msPP, mean ambulatory (ma) BP, maPP, and  
20 MAP will also be measured after 12 and 52 weeks of treatment.  
21  
22  
23  
24  
25

26  
27 Exploratory assessments comparing the two treatments after 12 and 52 weeks of treatment  
28 include pulse wave analysis (PWA) variables such as augmentation index (AIx),  
29 augmentation pressure, PP amplification ratio, duration of left ventricle (LV) ejection, and  
30 time to wave reflection; reduction in ma central (mac) BP, macMAP, and macPP; plasma  
31 biomarkers including NT-proBNP and urinary cyclic guanosine monophosphate  
32 (cGMP)/creatinine ratio and other biomarkers related to hypertension.  
33  
34  
35  
36  
37  
38

### 39 **Haemodynamic measurements**

40  
41 The SphygmoCor X-CEL System (AtCor Medical, Sydney, Australia) is being used to non-  
42 invasively derive the ascending aortic pressure waveform from the brachial waveform using  
43 a validated generalised transfer function (GTF).<sup>23</sup> A properly sized BP cuff is linked to a  
44 computer and software and the CASP, CAPP, augmentation pressure, and AIx are  
45 determined from the analysis of waveform by the system software.  
46  
47  
48  
49

50  
51 The SphygmoCor X-CEL system also measures the carotid-femoral aPWV, as the speed of  
52 the arterial pressure waveform as it travels through the descending aorta to the femoral  
53 artery, which is detected from simultaneously measured carotid and femoral arterial pulses.  
54 The carotid pulse is detected by applanation tonometry using a high-fidelity pressure  
55  
56  
57  
58  
59  
60

1  
2  
3 transducer (Millar Instruments, Houston, TX), while the femoral pulse is detected using a  
4 partially inflated blood pressure cuff wrapped around the upper thigh. The distance travelled  
5 by the pulse wave is captured by making physical measurements on the body surface  
6 according to the manufacturer's recommendations. This new brachial cuff-based device with  
7 an individualised sub-diastolic cuff pressure has recently been validated against the  
8 SphygmoCor device (AtCor Medical) using the classical radial tonometry-based  
9 methodology, and provides an operator-independent method to assess systolic pressure and  
10 aortic waveform comparable with the existing validated tonometric-based methods.<sup>24</sup>  
11 Measurements using SphygmoCor X-CEL system will be performed at baseline,  
12 randomisation, Week 12 or at the time of early discontinuation prior to Week 12, Week 52,  
13 or at the time of early discontinuation between Week 12 and Week 52.  
14  
15  
16  
17  
18  
19  
20  
21  
22  
23

24 The 24-hour maCAP and maPWA will be monitored using the oscillometric device, Mobil-  
25 O-Graph (IEM, Stolberg, Germany) with integrated ARC solver algorithms (Austrian  
26 Institute of Technology, Vienna, Austria). The traditional Mobil-O-Graph ambulatory blood  
27 pressure monitoring (ABPM) device has been available for more than a decade and through  
28 several product generations.<sup>25-28</sup> The actual blood pressure measuring unit was validated  
29 according to the British Hypertension Society (BHS) and the European Society of  
30 Hypertension (ESH) recommendations.<sup>25,27</sup> The method equipped with a GTF to derive aortic  
31 pressure waveforms<sup>29</sup> is based on brachial readings acquired in the course of the  
32 conventional pressure measurement at diastolic level.  
33  
34  
35  
36  
37  
38  
39

40 During the signal acquisition procedure, the received raw signals are separated into single  
41 waves and checked for their plausibility by means of extreme values and corresponding  
42 wavelengths using a cross-correlation approach. Poor waveforms are removed from further  
43 processing. After applying the GTF to each single waveform, the procedure is repeated. After  
44 final coherence verification, the quality judgment of grade '1' states that at least 80% of the  
45 waveforms were found to be eligible for further processing, while grades '2' and '3'  
46 represent a  $\geq 50\%$  and  $< 50\%$  valid waveforms, respectively.<sup>30</sup>  
47  
48  
49  
50  
51  
52  
53

54 Surrogates derived by this technique have been validated against solid-state catheter  
55 measurements and/or compared with non-invasive readings (e.g., tonometry,  
56 echocardiography) for aortic pressures,<sup>30-33</sup> wave reflections,<sup>34</sup> or aPWV.<sup>35,36</sup> However,  
57  
58  
59  
60

1  
2  
3 potential clinical usefulness has been demonstrated recently.<sup>37-39</sup> Furthermore, feasibility<sup>36</sup>  
4 and reproducibility<sup>40</sup> of cuff-based maPWA measurements have been reported. With respect  
5 to legal issues, the Mobil-O-Graph maPWA monitor with integrated ARC solver algorithms  
6 holds approvals from CE, FDA, and JPAL (amongst others).  
7  
8  
9

### 10 11 **Safety assessments**

12  
13  
14 Safety and tolerability assessments include regular monitoring and recording of all adverse  
15 events (AEs) and concomitant medications or significant non-drug therapies. Evaluations of  
16 routine blood chemistries, blood counts with white cell differential and urine analyses,  
17 physical examinations, electrocardiograms (ECGs), and monitoring of vital signs will be  
18 performed at regular intervals.  
19  
20  
21  
22

### 23 24 **Statistical analysis plan**

25  
26 A sample size of 183 completers per group is targeted, which is calculated based on the  
27 primary efficacy variable, change from baseline in mean CASP at 12 weeks, assuming a  
28 standard deviation of 19 mm Hg. The sample size is calculated to ensure a power of 90% to  
29 detect statistical significance for the comparison of LCZ696-based treatment regimen with  
30 the olmesartan-based treatment regimen in assessing the superiority at the Week 12 endpoint,  
31 under the alternative hypothesis that the treatment difference is 6.5 mmHg at a two-sided  
32 significance level of 0.05. Assuming a 15% dropout rate, the total targeted sample size to be  
33 randomised is 432 patients (216 per group). The primary variable at the Week 12 endpoint  
34 will be analysed using a two-way analysis of covariance (ANCOVA), with treatment and  
35 region as factors and the baseline as a covariate. Mean CAPP at the Week 12 endpoint will  
36 be analysed using the same type of ANCOVA model used for the primary efficacy analysis.  
37  
38  
39  
40  
41  
42  
43  
44  
45  
46  
47  
48  
49  
50  
51  
52  
53  
54  
55  
56  
57  
58  
59  
60

## DISCUSSION

Hypertension in patients over 60 years is often difficult to control because of age-associated adverse changes in vascular structure and function, especially arterial stiffening and the resulting changes in aortic haemodynamics. The majority of elderly patients present with features of arterial stiffening, notably ISH, disrupted circadian BP variation, a non-dipping or early morning riser phenotype of hypertension, and orthostatic hypertension. Moreover, compared with younger people, elderly patients are usually characterised with augmented aortic systolic and pulse pressures relative to brachial pressure, associated with diminished aortic-brachial pressure amplification resulting in the 'true' elevation of brachial systolic and pulse pressures. In turn, the elevated aortic and brachial pulse pressures that result from increased cardiac work to overcome the increased characteristic impedance of the aorta due to its age-related stiffening, causes an increased predisposition to left ventricular hypertrophy, myocardial ischaemia and heart failure.

Our hypothesis is that the ARNI LCZ696 provides a novel approach to neurohormonal modulation by concomitantly enhancing the NP system and suppressing the RAAS. Owing to the effects of enhanced NPs and RAAS inhibition, LCZ696 is anticipated to improve aortic stiffness, reduce characteristic impedance, and improve central haemodynamics. NPs inhibit the production and action of vasoconstrictor peptides, inhibit sympathetic outflow, and protect against excess salt and water retention.<sup>41</sup> NPs also inhibit cardiac growth or the development of compensatory cardiac hypertrophy and regulate CV function.<sup>41</sup> Inhibition of sympathetic tone might be beneficial in controlling morning surge in BP in elderly patients with hypertension.<sup>42,43</sup> Additionally, suppressing the RAAS offers the potential for many similar actions on CV structure and function as well as favourable effects on microcirculatory haemodynamics as evidenced by observations of reduced albuminuria and renal protection beyond what might have been anticipated from BP reduction alone.

It has already been demonstrated that LCZ696 provides superior reductions in msSBP and msDBP versus valsartan in an 8-week study including 1328 patients with mild-to-moderate hypertension. In addition, LCZ696 significantly reduced maSBP versus valsartan (between-treatment difference: LCZ696 200 mg versus valsartan 160 mg,  $-3.23$  mm Hg, 95% CI  $-5.70$  to  $-0.75$ ; LCZ696 400 mg versus valsartan 320 mg,  $-5.14$  mm Hg, 95% CI  $-7.70$  to  $-2.59$ ).

1  
2  
3 However, there was no significant treatment difference in maDBP reductions, thereby  
4 providing evidence of improvements in PP with LCZ696 versus valsartan. These findings are  
5 consistent with improvements in large artery function. Furthermore, BP control rates were  
6 significantly higher with LCZ696 200 mg than with 160 mg valsartan (46% [78/168] versus  
7 33% [54/163],  $p = 0.0147$ ). Importantly, in these studies, unlike the vasopeptidase inhibitor  
8 omapatrilat, LCZ696 was generally well tolerated without an incidence of angio-oedema  
9 during 8 weeks of treatment.<sup>21</sup>  
10  
11

12 The reported improvements in PP suggest the potential for LCZ696 to protect more  
13 effectively than the existing BP-lowering agents from several consequences of ISH and  
14 vascular stiffness, such as stroke and diastolic heart failure. However, in the study by Ruilope  
15 et al<sup>21</sup> CAP, central haemodynamics and arterial stiffness were not assessed, precluding a  
16 meticulous assessment of the mechanisms underpinning the superior antihypertensive  
17 properties of LCZ696.  
18  
19

20 In the PARAMETER study, the measurement of CAP should more accurately assess the  
21 loading conditions on the LV, myocardium, coronary arteries, cerebral vasculature, and  
22 therefore theoretically CAP should provide a basis for more effective protection against CV  
23 target organ damage and events compared with brachial pressures. In this regard, even in  
24 normotensive individuals, measurement of aortic BP enhances the ability to predict the target  
25 organ changes.<sup>44</sup>  
26  
27

28 The PARAMETER study was initiated in December 2012 with a novel design to evaluate  
29 central haemodynamics in elderly patients with ISH and a widened PP at 12 and 52 weeks of  
30 treatment with LCZ696 or ARB olmesartan. If the changes in CASP at 12 weeks (acute  
31 haemodynamic effect) are larger than that in SBP, this would support the hypothesis that  
32 LCZ696 has the potential to favourably impact aortic haemodynamics and improve  
33 ventricular-vascular coupling in elderly patients with aged aortas and ISH. Treatment  
34 differences in PWV at 52 weeks would further support a direct beneficial effect of LCZ696  
35 on aortic stiffness due to structural changes, independent of MAP, as both treatment groups  
36 will be titrated to achieve similar BP control. The overall effect of LCZ696 on maBP  
37 (maSBP, maDBP and maPP), 24-hour BP variability (standard deviation, covariance), and  
38 circadian BP rhythms (nocturnal dipping status and morning surge) will also be assessed in  
39  
40  
41  
42  
43  
44  
45  
46  
47  
48  
49  
50  
51  
52  
53  
54  
55  
56  
57  
58  
59  
60



1  
2  
3 comparison with olmesartan. The study targets randomisation of 432 patients and final  
4 results are expected in 2015. The results of the PARAMETER study will impact the design  
5 of phase III studies assessing the CV protection potential of LCZ696 in elderly patients with  
6 ISH.  
7  
8  
9

10  
11 In addition to the PARAMETER study, the efficacy and safety of LCZ696 is being evaluated  
12 in related studies, for example, in comparison with olmesartan in elderly patients with mild-  
13 to-moderate hypertension, in patients with systolic hypertension and in patients with systolic  
14 hypertension who did not respond to olmesartan. Although it is hypothesised in the  
15 PARAMETER study that LCZ696 will be more effective at lowering both central aortic and  
16 brachial BP compared with olmesartan, it is also recognised that other agents may need to be  
17 added to reach recommended BP goals in the elderly patients with systolic hypertension.  
18 Both calcium channel blockers (CCBs, usually amlodipine) and diuretics are the most  
19 commonly used antihypertensive agents in combination with RAAS blockade for patients  
20 failing to achieve their BP goal with RAAS blockade monotherapy. Besides being very  
21 effective, such combination therapies of specific antihypertensive classes may also improve  
22 safety and tolerability. For example, addition of ARBs to CCBs has been shown to reduce the  
23 peripheral oedema associated with amlodipine monotherapy.<sup>45</sup> Similarly, diuretic-induced  
24 hypokalaemia has been shown to be attenuated when RAAS blockade is combined with  
25 diuretic therapy.<sup>46</sup> To further evaluate such combination therapies with LCZ696, the BP-  
26 lowering efficacy, safety and tolerability is being evaluated in combination with amlodipine  
27 in patients with mild-to-moderate hypertension who were non-responsive to amlodipine and  
28 in patients with systolic hypertension. There are also other trials investigating the efficacy  
29 and safety of LCZ696 in patients with severe hypertension and in patients with renal  
30 impairment.  
31  
32  
33  
34  
35  
36  
37  
38  
39  
40  
41  
42  
43  
44  
45  
46

47 In summary, the PARAMETER study will evaluate mechanisms associated with BP-  
48 lowering in elderly patients with an aged CV system as evidenced by systolic hypertension  
49 and a widened PP. The study will define whether LCZ696, a first-in-class ARNI is more  
50 effective in lowering CASP and CAPP than the ARB olmesartan and also explore whether  
51 this effect is related to a BP-independent reduction in arterial stiffening suggesting a novel  
52  
53  
54  
55  
56  
57  
58  
59  
60

1  
2  
3 mechanism to target systolic hypertension, a major and increasingly important unmet  
4 therapeutic need in the management of hypertension in elderly patients.  
5  
6

## 7 8 **ACKNOWLEDGEMENTS**

9  
10 We acknowledge Dr. Sreedevi Boggarapu (Novartis Healthcare Pvt. Ltd., Hyderabad, India)  
11 for medical writing and editorial support. We also thank all the clinical investigators and  
12 study coordinators at the participating centres and all the patients who participate in the  
13 study.  
14  
15  
16  
17

## 18 19 **CONFLICTS OF INTERESTS**

20 BW, JC, and KK have received honoraria from Novartis for consulting and presentations at  
21 scientific symposia. DZ, PC, AH, PB, and JZ are employees of Novartis and are thus eligible  
22 for Novartis stock and stock options.  
23  
24  
25  
26

## 27 28 **FUNDING STATEMENT**

29 This study is funded by Novartis Pharma AG, Basel, Switzerland.  
30  
31  
32  
33  
34  
35  
36  
37  
38  
39  
40  
41  
42  
43  
44  
45  
46  
47  
48  
49  
50  
51  
52  
53  
54  
55  
56  
57  
58  
59  
60



## Reference List

1. Kearney PM, Whelton M, Reynolds K, et al. Global burden of hypertension: analysis of worldwide data. *Lancet* 2005;365:217-23.
2. Lawes CM, Vander HS, Rodgers A. Global burden of blood-pressure-related disease, 2001. *Lancet* 2008;371:1513-8.
3. Lionakis N, Mendrinou D, Sanidas E, et al. Hypertension in the elderly. *World J Cardiol* 2012;4:135-47.
4. Arguedas JA, Perez MI, Wright JM. Treatment blood pressure targets for hypertension. *Cochrane Database of Systematic Reviews* 2009.
5. Franklin SS, Jacobs MJ, Wong ND, et al. Predominance of isolated systolic hypertension among middle-aged and elderly US hypertensives: analysis based on National Health and Nutrition Examination Survey (NHANES) III. *Hypertension* 2001;37:869-74.
6. Vasani RS, Beiser A, Seshadri S, et al. Residual lifetime risk for developing hypertension in middle-aged women and men: The Framingham Heart Study. *JAMA* 2002;287:1003-10.
7. Palatini P, Casiglia E, Gasowski J, et al. Arterial stiffness, central hemodynamics, and cardiovascular risk in hypertension. *Vasc Health Risk Manag* 2011;7:725-39.
8. Vlachopoulos C, Aznaouridis K, O'Rourke MF, et al. Prediction of cardiovascular events and all-cause mortality with central haemodynamics: a systematic review and meta-analysis. *Eur Heart J* 2010;31:1865-71.
9. Mitchell GF, Vasani RS, Keyes MJ, et al. Pulse pressure and risk of new-onset atrial fibrillation. *JAMA* 2007;297:709-15.
10. Waldstein SR, Rice SC, Thayer JF, et al. Pulse pressure and pulse wave velocity are related to cognitive decline in the Baltimore Longitudinal Study of Aging. *Hypertension* 2008;51:99-104.
11. Ford ML, Tomlinson LA, Chapman TP, et al. Aortic stiffness is independently associated with rate of renal function decline in chronic kidney disease stages 3 and 4. *Hypertension* 2010;55:1110-5.
12. Manisty CH, Hughes AD. Meta-analysis of the comparative effects of different classes of antihypertensive agents on brachial and central systolic blood pressure, and augmentation index. *Br J Clin Pharmacol* 2013;75:79-92.
13. Roman MJ, Devereux RB, Kizer JR, et al. Central pressure more strongly relates to vascular disease and outcome than does brachial pressure: the Strong Heart Study. *Hypertension* 2007;50:197-203.

14. Roman MJ, Okin PM, Kizer JR, et al. Relations of central and brachial blood pressure to left ventricular hypertrophy and geometry: the Strong Heart Study. *J Hypertens* 2010;28:384-8.
15. Wang KL, Cheng HM, Chuang SY, et al. Central or peripheral systolic or pulse pressure: which best relates to target organs and future mortality? *J Hypertens* 2009;27:461-7.
16. Jankowski P, Kawecka-Jaszcz K, Czarnańska D, et al. Ascending aortic, but not brachial blood pressure-derived indices are related to coronary atherosclerosis. *Atherosclerosis* 2004;176:151-5.
17. Ostergren J, Poulter NR, Sever PS, et al. The Anglo-Scandinavian Cardiac Outcomes Trial: blood pressure-lowering limb: effects in patients with type II diabetes. *J Hypertens* 2008;26:2103-11.
18. Williams B, Lacy PS, Thom SM, et al. Differential impact of blood pressure-lowering drugs on central aortic pressure and clinical outcomes: principal results of the Conduit Artery Function Evaluation (CAFE) study. *Circulation* 2006;113:1213-25.
19. Mitchell GF, Izzo JL, Jr., Lacourciere Y, et al. Omapatrilat reduces pulse pressure and proximal aortic stiffness in patients with systolic hypertension: results of the conduit hemodynamics of omapatrilat international research study. *Circulation* 2002;105:2955-61.
20. Veelken R, Schmieder RE. Neutral endopeptidase inhibition: the potential of a new therapeutic approach in cardiovascular disease evolves. *J Hypertens* 2002;20:599-603.
21. Ruilope LM, Dukat A, Bohm M, et al. Blood-pressure reduction with LCZ696, a novel dual-acting inhibitor of the angiotensin II receptor and neprilysin: a randomised, double-blind, placebo-controlled, active comparator study. *Lancet* 2010;375:1255-66.
22. Solomon SD, Zile M, Pieske B, et al. The angiotensin receptor neprilysin inhibitor LCZ696 in heart failure with preserved ejection fraction: a phase 2 double-blind randomised controlled trial. *Lancet* 2012;380:1387-95.
23. Gallagher D, Adji A, O'Rourke MF. Validation of the transfer function technique for generating central from peripheral upper limb pressure waveform. *Am J Hypertens* 2004;17:1059-67.
24. Butlin M, Qasem A, Avolio AP. Estimation of central aortic pressure waveform features derived from the brachial cuff volume displacement waveform. *Conf Proc IEEE Eng Med Biol Soc* 2012;2012:2591-4.
25. Franssen PM, Imholz BP. Evaluation of the Mobil-O-Graph new generation ABPM device using the ESH criteria. *Blood Press Monit* 2010;15:229-31.
26. Jones CR, Taylor K, Chowienczyk P, et al. A validation of the Mobil O Graph (version 12) ambulatory blood pressure monitor. *Blood Press Monit* 2000;5:233-8.

- 1  
2  
3 27. Wei W, Tolle M, Zidek W, et al. Validation of the mobil-O-Graph: 24 h-blood pressure  
4 measurement device. *Blood Press Monit* 2010;15:225-8.  
5
- 6 28. Westhoff TH, Straub-Hohenbleicher H, Schmidt S, et al. Convenience of ambulatory blood  
7 pressure monitoring: comparison of different devices. *Blood Press Monit* 2005;10:239-42.  
8
- 9 29. Wassertheurer S, Mayer C, Breitenecker F. Modeling arterial and left ventricular coupling  
10 for non-invasive measurements. *Simulation Modelling Practice and Theory* 2008;16:988-  
11 97.  
12
- 13 30. Wassertheurer S, Kropf J, Weber T, et al. A new oscillometric method for pulse wave  
14 analysis: comparison with a common tonometric method. *J Hum Hypertens* 2010;24:498-  
15 504.  
16
- 17 31. Nunan D, Wassertheurer S, Lasserson D, et al. Assessment of central haemodynamics  
18 from a brachial cuff in a community setting. *BMC Cardiovasc Disord* 2012;12:48.  
19
- 20 32. Weber T, Wassertheurer S, Rammer M, et al. Validation of a brachial cuff-based method  
21 for estimating central systolic blood pressure. *Hypertension* 2011;58:825-32.  
22
- 23 33. Weiss W, Gohlisch C, Harsch-Gladisch C, et al. Oscillometric estimation of central blood  
24 pressure: validation of the Mobil-O-Graph in comparison with the SphygmoCor device.  
25 *Blood Press Monit* 2012;17:128-31.  
26
- 27 34. Hametner B, Wassertheurer S, Kropf J, et al. Wave reflection quantification based on  
28 pressure waveforms alone--methods, comparison, and clinical covariates. *Comput Methods*  
29 *Programs Biomed* 2013;109:250-9.  
30
- 31 35. Hametner B, Wassertheurer S, Kropf J, et al. Oscillometric estimation of aortic pulse wave  
32 velocity: comparison with intra-aortic catheter measurements. *Blood Press Monit*  
33 2013;18:173-6.  
34
- 35 36. Luzardo L, Lujambio I, Sottolano M, et al. 24-h ambulatory recording of aortic pulse wave  
36 velocity and central systolic augmentation: a feasibility study. *Hypertens Res* 2012;35:980-  
37 7.  
38
- 39 37. Reppel M, Franzen K, Bode F, et al. Central hemodynamics and arterial stiffness during the  
40 finals of the world cup soccer championship 2010. *Int J Cardiol* 2013;166:627-32.  
41
- 42 38. Weber T, Wassertheurer S, Rammer M, et al. Wave reflections, assessed with a novel  
43 method for pulse wave separation, are associated with end-organ damage and clinical  
44 outcomes. *Hypertension* 2012;60:534-41.  
45
- 46 39. Weber T, Wassertheurer S, O'Rourke MF, et al. Pulsatile hemodynamics in patients with  
47 exertional dyspnea: potentially of value in the diagnostic evaluation of suspected heart  
48 failure with preserved ejection fraction. *J Am Coll Cardiol* 2013;61:1874-83.  
49  
50  
51  
52  
53  
54  
55  
56  
57  
58  
59  
60

- 1
- 2
- 3
- 4 40. Protogerou AD, Argyris A, Nasothimiou E, et al. Feasibility and reproducibility of
- 5 noninvasive 24-h ambulatory aortic blood pressure monitoring with a brachial cuff-based
- 6 oscillometric device. *Am J Hypertens* 2012;25:876-82.
- 7
- 8 41. Levin ER, Gardner DG, Samson WK. Natriuretic peptides. *N Engl J Med* 1998;339:321-8.
- 9
- 10 42. London GM, Weiss YA, Pannier BP, et al. Tilt test in essential hypertension. Differential
- 11 responses in heart rate and vascular resistance. *Hypertension* 1987;10:29-34.
- 12
- 13 43. Okada Y, Galbreath MM, Shibata S, et al. Morning Blood Pressure Surge is Associated
- 14 with Arterial Stiffness and Sympathetic Baroreflex Sensitivity in Hypertensive Seniors. *Am J*
- 15 *J Physiol Heart Circ Physiol* 2013.
- 16
- 17
- 18 44. Booyesen HL, Norton GR, Maseko MJ, et al. Aortic, but not brachial blood pressure
- 19 category enhances the ability to identify target organ changes in normotensives. *J*
- 20 *Hypertens* 2013;31:1124-30.
- 21
- 22
- 23 45. Chazova IE, Dongre N, Vighdorchik AV. Real-life safety and effectiveness of
- 24 amlodipine/valsartan combination in the treatment of hypertension. *Adv Ther* 2011;28:134-
- 25 49.
- 26
- 27
- 28 46. Palmer BF. Improving BP control with combined renin-angiotensin system blockade and
- 29 thiazide diuretics in hypertensive patients with diabetes mellitus or kidney disease. *Am J*
- 30 *Cardiovasc Drugs* 2008;8:9-14.
- 31
- 32
- 33
- 34
- 35
- 36
- 37
- 38
- 39
- 40
- 41
- 42
- 43
- 44
- 45
- 46
- 47
- 48
- 49
- 50
- 51
- 52
- 53
- 54
- 55
- 56
- 57
- 58
- 59
- 60

Figure 1. Study design

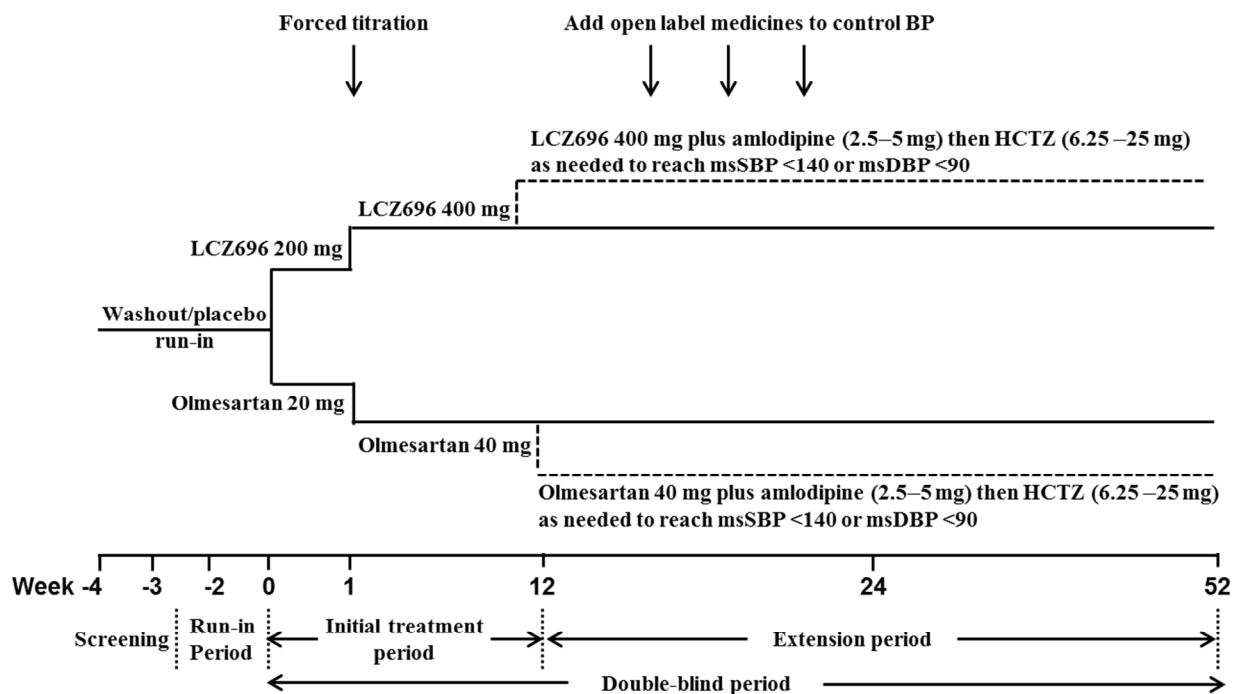

HCTZ, hydrochlorothiazide; msDBP, mean sitting diastolic blood pressure; msSBP, mean sitting systolic blood pressure

review only

## Box 1.

**Inclusion criteria**

- Patients with essential hypertension aged  $\geq 60$  years
- Either untreated or treated with antihypertensive agents, and who have msSBP  $\geq 150$  and  $< 180$  mm Hg at randomisation are eligible to be included.
  - Untreated patients (if they are newly diagnosed or have not been treated with antihypertensive drugs for the 4 weeks prior to screening) must have msSBP  $\geq 150$  mm Hg and  $< 180$  mm Hg at screening and randomisation.
  - Patients who have been treated with antihypertensive drugs during 4 weeks prior to screening must have msSBP  $\geq 140$  mm Hg and  $< 180$  mm Hg after 1 or 2 weeks of washout/placebo run-in and  $\geq 150$  mm Hg and  $< 180$  mm Hg at randomisation.
  - Patients must have a difference in msSBP of within  $\pm 15$  mm Hg between randomisation and the visit preceding randomisation.
- All patients must have a PP  $> 60$  mmHg at randomisation.
- Patients who comply with all study requirements and demonstrate good medication compliance ( $\geq 80\%$  compliance rate) during the amlodipine run-in period

Only

**Box 2.****Exclusion criteria**

- Malignant or severe hypertension or secondary causes of hypertension
- History of atrial fibrillation or atrial flutter during 3 months prior to screening or active atrial fibrillation or atrial flutter on electrocardiogram during 12 months prior to screening
- History of cardiovascular disease (e.g., myocardial infarction) during the 12 months prior to screening
- Existing angina pectoris requiring pharmacological therapy (other than patients on a stable dose of oral or topical nitrates)
- Type 1 or type 2 diabetes mellitus not well controlled based on the investigator's clinical judgment
- Previous or current diagnosis of heart failure (NYHA Class II-IV), cardiac abnormalities such as Second or third degree atrioventricular block without a pacemaker, or malignancy
- Evidence of severe renal impairment (e.g., estimated glomerular filtration rate [eGFR] <30 ml/min/1.73 m<sup>2</sup>)
- Laboratory abnormalities such as serum potassium >5.5 mmol/L
- Known active liver disease or cirrhosis or evidence of hepatic disease
- Patients requiring any drug treatment that could affect BP
- Women of child bearing potential unless using highly effective methods of contraception during dosing



**Rationale and study design of the Prospective comparison  
of Angiotensin Receptor neprilysin inhibitor with  
Angiotensin receptor blocker MEasuring arterial sTiffness in  
the eldERly (PARAMETER) study**

|                                 |                                                                                                                                                                                                                                                                                                                                                                                                                                                                                                                                                                            |
|---------------------------------|----------------------------------------------------------------------------------------------------------------------------------------------------------------------------------------------------------------------------------------------------------------------------------------------------------------------------------------------------------------------------------------------------------------------------------------------------------------------------------------------------------------------------------------------------------------------------|
| Journal:                        | <i>BMJ Open</i>                                                                                                                                                                                                                                                                                                                                                                                                                                                                                                                                                            |
| Manuscript ID:                  | bmjopen-2013-004254.R1                                                                                                                                                                                                                                                                                                                                                                                                                                                                                                                                                     |
| Article Type:                   | Protocol                                                                                                                                                                                                                                                                                                                                                                                                                                                                                                                                                                   |
| Date Submitted by the Author:   | 08-Dec-2013                                                                                                                                                                                                                                                                                                                                                                                                                                                                                                                                                                |
| Complete List of Authors:       | Williams, Bryan; University College London, Institute of Cardiovascular Science;<br>Cockroft, John; University of Cardiff, Cardiology<br>Kario, Kazuomi; Jichi Medical University School of Medicine, Medicine<br>Zappe, Dion; Novartis Pharmaceuticals Corporation, Clinical Medicine<br>Cardenas, Pamela; Novartis Pharmaceuticals Corporation, Clinical Medicine<br>Hester, Robert; Novartis Pharmaceuticals Corporation, IIS/PC Franchise<br>Brunel, Patrick; Novartis Pharma AG, Clinical Medicine<br>Zhang, Jack; Beijing Novartis Pharma Co. Ltd, Clinical Medicine |
| <b>Primary Subject Heading</b>: | Cardiovascular medicine                                                                                                                                                                                                                                                                                                                                                                                                                                                                                                                                                    |
| Secondary Subject Heading:      | Pharmacology and therapeutics                                                                                                                                                                                                                                                                                                                                                                                                                                                                                                                                              |
| Keywords:                       | Hypertension < CARDIOLOGY, Vascular medicine < INTERNAL MEDICINE,<br>Cardiology < INTERNAL MEDICINE                                                                                                                                                                                                                                                                                                                                                                                                                                                                        |
|                                 |                                                                                                                                                                                                                                                                                                                                                                                                                                                                                                                                                                            |

SCHOLARONE™  
Manuscripts



**Version 2 – Resubmission to BMJ Open****Manuscript ID bmjopen-2013-004254****Rationale and study design of the Prospective comparison of Angiotensin Receptor neprilysin inhibitor with Angiotensin receptor blocker MEasuring arterial sTiffness in the eldERly (PARAMETER) study**

Bryan Williams,<sup>1</sup> John R. Cockcroft,<sup>2</sup> Kazuomi Kario,<sup>3</sup> Dion H. Zappe,<sup>4</sup> Pamela Cardenas,<sup>4</sup> Allen Hester,<sup>4</sup> Patrick Brunel,<sup>5</sup> Jack Zhang<sup>4</sup>

<sup>1</sup>Department of Cardiovascular Sciences, University College of London, London, UK;

<sup>2</sup>Department of Cardiology, University of Cardiff, Wales, UK; <sup>3</sup>Jichi Medical School, Tochigi,

Japan; <sup>4</sup>Novartis Pharmaceuticals Corporation, East Hanover, New Jersey, USA; <sup>5</sup>Novartis

Pharma AG, Basel, Switzerland

**Corresponding Author:**

Bryan Williams MD FRCP FAHA FESC

Professor of Medicine

Director; National Institute for Health Research (NIHR) University College London Hospitals Biomedical Research Centre

Institute of Cardiovascular Science

University College London

170 Tottenham Court Road

W1T 7HA

London

United Kingdom

Phone number: +442031082357

E-mail [bryan.williams@ucl.ac.uk](mailto:bryan.williams@ucl.ac.uk)

1  
2  
3 **Key words:** arterial stiffness, central aortic systolic pressure, isolated systolic hypertension,  
4 pulse pressure, LCZ696, elderly  
5  
6  
7

8  
9 **Word count:** 3920 words excluding title page, abstract, references, tables, and figures  
10  
11  
12  
13  
14  
15  
16  
17  
18  
19  
20  
21  
22  
23  
24  
25  
26  
27  
28  
29  
30  
31  
32  
33  
34  
35  
36  
37  
38  
39  
40  
41  
42  
43  
44  
45  
46  
47  
48  
49  
50  
51  
52  
53  
54  
55  
56  
57  
58  
59  
60

For peer review only

1  
2  
3 **ABSTRACT** Introduction; Methods and Analysis; Ethics and  
4  
5  
6  
7  
8  
9  
10  
11  
12  
13  
14  
15  
16  
17  
18  
19  
20  
21  
22  
23  
24  
25  
26  
27  
28  
29  
30  
31  
32  
33  
34  
35  
36  
37  
38  
39  
40  
41  
42  
43  
44  
45  
46  
47  
48  
49  
50  
51  
52  
53  
54  
55  
56  
57  
58  
59  
60

Dissemination.

**Introduction:** Hypertension in elderly people is characterised by elevated systolic blood pressure (SBP) and increased pulse pressure (PP), which indicate large artery ageing and stiffness. LCZ696, a first-in-class angiotensin receptor neprilysin inhibitor (ARNI), is being developed to treat hypertension and heart failure. The Prospective comparison of Angiotensin Receptor neprilysin inhibitor with Angiotensin receptor blocker MEasuring arterial sTiffness in the elderLy (PARAMETER) study will assess the efficacy of LCZ696 versus olmesartan on aortic stiffness and central aortic haemodynamics.

**Methods and Analysis:** In this 52-week multicentre study, patients with hypertension aged  $\geq 60$  years with a mean seated (ms) SBP  $\geq 150$ – $<180$ mmHg and a PP  $>60$ mmHg will be randomised to once-daily LCZ696 200mg or olmesartan 20mg for 4 weeks, followed by a forced-titration to double the initial doses for the next 8 weeks. At 12–24 weeks, if the BP target has not been attained (msSBP  $<140$ mmHg and ms diastolic blood pressure  $<90$  mmHg), amlodipine (2.5–5mg) and subsequently hydrochlorothiazide (6.25–25mg) can be added. The primary and secondary endpoints are changes from baseline in central aortic systolic pressure (CASP) and central aortic PP (CAPP) at Week 12, respectively. Other secondary endpoints are the changes in CASP and CAPP at Week 52. A sample size of 432 randomised patients is estimated to ensure a power of 90% to assess the superiority of LCZ696 over the olmesartan at Week 12 in the change from baseline of mean CASP, assuming a standard deviation of 19mmHg, the difference of 6.5mmHg and a 15% dropout rate. The primary variable will be analysed using a two-way analysis of covariance.

**Ethics and Dissemination:** The study was initiated in December 2012 and final results are expected in 2015. The results of this study will impact the design of future phase III studies assessing cardiovascular protection.

**Clinical trials identifier:** EUDract number 2012-002899-14 and ClinicalTrials.gov NCT01692301.

**Key words:** arterial stiffness, central aortic systolic pressure, isolated systolic hypertension, pulse pressure, LCZ696, elderly

## Strengths and Weaknesses of this Study

### Strengths:

- This is a randomized controlled trial of a new class of drug therapy (angiotensin receptor neprilysin inhibitor – ARNI) for hypertension versus a comparator that blocks only the angiotensin receptor – this will inform on the added value of neprilysin inhibition in the context of systolic hypertension;
- The study incorporates a detailed clinical experimental medicine mechanistic study that will interrogate the actions of this new drug class on vascular haemodynamics and function;
- The study evaluates the a novel treatment approach for a major unmet clinical need, i.e. systolic hypertension

### Weaknesses

- The study has inadequate statistical power to assess the impact of the interventions on major clinical outcomes beyond blood pressure and vascular haemodynamics and function.

## INTRODUCTION

Hypertension accounts for 9.4 million cardiovascular (CV) deaths annually worldwide and is affecting more than two-thirds of people aged  $\geq 65$  years, an age group that is growing globally.<sup>1,2</sup> The treatment of hypertension has been shown to reduce the risk of morbidity and mortality associated with elevated blood pressure (BP) including stroke, ischaemic heart disease, heart failure, chronic kidney disease and possibly cognitive decline.<sup>3</sup> Despite the availability of multiple drug classes with different mechanisms of action, hypertension, especially systolic blood pressure (SBP), remains inadequately controlled.<sup>4,5,6</sup>

The SBP usually increases from childhood throughout the life, while diastolic BP (DBP) remains relatively constant or decreases beyond 50 to 60 years of age. The changing patterns of BP throughout the life reflect different pathologies. In the young, hypertension is predominantly due to an increased DBP and mean arterial pressure (MAP), as a result of a relative increase in cardiac output and/or increased peripheral vascular resistance.<sup>7</sup> On the other hand, advancing age, beyond mid-life, is associated with an increased stiffness of large elastic arteries, especially the aorta. Arterial stiffening adversely affects the characteristic impedance of the aorta, requiring more cardiac work and raising SBP as more stroke volume is delivered during systole owing to the increased pulse wave velocity (PWV). DBP also decreases due to less elastic recoil leading to reduced flow, thus increasing PP independent of any changes in MAP. PWV been shown to be an independent predictor of CV outcomes, including mortality,<sup>8</sup> myocardial infarction (MI),<sup>8</sup> stroke,<sup>8</sup> atrial fibrillation,<sup>9</sup> cognitive decline<sup>10</sup> and renal dysfunction<sup>11</sup> and more specifically aortic PWV (aPWV), a robust measure of aortic arterial stiffness, has been shown to predict the adverse CV outcomes.<sup>7</sup>

Another consequence of arterial ageing and stiffening is that the amplification of SBP and PP from the aortic root to the peripheral arteries diminishes. In a healthy arterial system, central aortic systolic pressure (CASP) and PP are amplified as they move towards the periphery, such that the measured brachial systolic pressure is typically around 10 mm Hg higher than the corresponding aortic root pressure<sup>12</sup>. With ageing, this amplification is reduced because of the increased PWV and the increase in the early wave reflection resulting in the measured brachial SBP and PP becoming closer to the corresponding aortic root pressures. Some studies have suggested that central pressures may have a closer correlation than peripheral

1  
2  
3 BP with end organ damage<sup>13-15</sup> and CV risk,<sup>15</sup> such as extent of coronary atherosclerosis,  
4 carotid intima-media thickness, left ventricular hypertrophy, and left ventricular diastolic  
5 function.<sup>14,16,17</sup>  
6  
7

8  
9 These observations raise the intriguing question as to whether treatments used to lower blood  
10 pressure could differentially affect aortic relative to brachial pressures and also arterial  
11 stiffness per se. It has been demonstrated that BP-lowering drugs can have marked  
12 differential effects on central aortic pressure (CAP) and brachial BP.<sup>18</sup> These effects mimic a  
13 functional anti-ageing effect in terms of their impact on wave-form morphology, and greater  
14 reduction in central pressures relative to brachial pressures. Intriguingly, the beta-blockers, a  
15 drug class which was least effective at lowering aortic pressure also appeared to be the least  
16 effective class at reducing the risk of stroke in elderly patients.<sup>18</sup> This supports the concept  
17 that the more effective lowering of aortic relative to brachial pressure may be clinically  
18 important.  
19  
20  
21  
22  
23  
24  
25  
26

27  
28 Despite the findings cited above, controlling SBP remains the most important unmet need in  
29 the clinical management of hypertension. The rise in SBP and PP with ageing appears to be  
30 strongly related to arterial stiffening and increased impedance to flow through a stiff aorta.  
31 This suggests that the treatments targeting aortic stiffening and reducing characteristic  
32 impedance would be effective particularly at reducing systolic pressure. Early proof of this  
33 concept came from the studies with omapatrilat, a vasopeptidase inhibitor that  
34 simultaneously inhibits neprilysin and angiotensin-converting enzyme (ACE). Neprilysin  
35 inhibition enhances natriuretic peptide (NP) levels by blocking their degradation. NP has  
36 vasodilating actions, which could reduce aortic stiffness, improve characteristic impedance  
37 and thereby reduce SBP and PP. Studies with omapatrilat show greater improvements in  
38 aortic characteristic impedance compared with enalapril, beyond the effects of BP-lowering  
39 after 12 weeks of therapy.<sup>19</sup> This benefit on aortic function was also associated with  
40 impressive data on SBP and PP lowering in patients with hypertension.  
41  
42  
43  
44  
45  
46  
47  
48  
49  
50

51  
52 Although omapatrilat was withdrawn due to safety concerns, a proof of concept was  
53 established for concomitant inhibition of neprilysin and renin-angiotensin-aldosterone system  
54 (RAAS) with the potential to be an attractive treatment strategy to improve aortic  
55 haemodynamics. Increased NP levels also promote natriuresis and reduce sympathetic tone,  
56  
57  
58  
59  
60

1  
2  
3 together with antiproliferative and antihypertrophic effects, and inhibition of aldosterone  
4 secretion.<sup>20</sup> Alongside, suppression of RAAS would be complementary to neprilysin  
5 inhibition, which attenuates vasoconstriction, reduces sodium and water retention and also  
6 inhibits the development of CV hypertrophy and adverse re-modelling.  
7  
8  
9

10  
11 Recently LCZ696, a first-in-class angiotensin receptor neprilysin inhibitor (ARNI), has been  
12 developed. LCZ696 delivers systemic exposure to a neprilysin inhibitor prodrug, AHU377  
13 (which rapidly converts into active LBQ657), and an angiotensin receptor blocker (ARB),  
14 valsartan. LCZ696 at 100, 200 and 400 mg once daily, in patients with mild-to-moderate  
15 essential hypertension, resulted in greater BP reductions than corresponding doses of  
16 valsartan alone (160 and 320 mg) and was well tolerated.<sup>21</sup> LCZ696 compared with valsartan  
17 was effective especially at reducing brachial SBP and PP. Furthermore, in patients with heart  
18 failure with preserved ejection fraction, LCZ696 has shown to reduce N-terminal-pro B-type  
19 natriuretic peptide (NT-proBNP), a biomarker of left ventricular (LV) wall stress, to a greater  
20 extent than valsartan alone at 12 weeks and was well tolerated.<sup>22</sup>  
21  
22  
23  
24  
25  
26  
27  
28  
29

30 Thus, the big challenge in hypertension treatment is to reduce the SBP, and the available  
31 evidence suggests that this could be achieved by improving the haemodynamic performance  
32 of the ageing aorta. The Prospective comparison of Angiotensin Receptor neprilysin inhibitor  
33 with Angiotensin receptor blocker MEasuring arterial sTiffness in the elderLy  
34 (PARAMETER) study is designed to compare the effect of LCZ696 with olmesartan, an  
35 ARB, on CASP, other measures of central aortic haemodynamics and arterial stiffness, and  
36 ambulatory blood pressures in elderly patients with an elevated brachial SBP and a widened  
37 PP. The widened PP was chosen as an entry criteria as being indicative of aortic stiffening  
38 and advanced aortic ageing. The objective is to determine whether the ARNI LCZ696 can  
39 reverse some of the effects of arterial ageing in elderly patients with systolic hypertension,  
40 and thereby improve aortic pressures and haemodynamics. The study was initiated in  
41 December 2012 and the final results are expected in 2015. This manuscript describes the  
42 design, objectives and pre-specified analysis plan for the PARAMETER study.  
43  
44  
45  
46  
47  
48  
49  
50  
51  
52  
53  
54  
55  
56  
57  
58  
59  
60

## METHODS

### Study design

The PARAMETER study is a 52-week, multicentre, randomised, double-blind, active-controlled, parallel-group study, involving 51 centres from 13 countries (Europe 47%, South America 14%, Asia 19% and US 20% — see online supplement for list of local investigators and participating centres). The study includes a screening period, a placebo run-in, and an initial double-blind treatment period of 12 weeks with LCZ696 monotherapy, followed by a double-blind extension of 40 weeks, during which add-on therapy is allowed to reach the BP treatment goal. Patients will be randomised to receive either once-daily LCZ696 200 mg or olmesartan 20 mg for 4 weeks, followed by a forced-titration to double the initial doses for the next 8 weeks. After 12 weeks, patients with uncontrolled BP (mean sitting [ms] SBP >140 mm Hg and/or msDBP >90 mm Hg) will be prescribed amlodipine (2.5–5 mg) and then hydrochlorothiazide (6.25–25 mg) as needed, at an interval of 4 weeks up to Week 24 (Figure 1). This study has been approved by all relevant ethics committees. The study is registered as EUDract number 2012-002899-14 and on ClinicalTrials.gov under the code NCT01692301.

### Study participants

Elderly patients (aged  $\geq 60$  years) with essential hypertension (either untreated or treated with antihypertensive agents) and patients who have msSBP  $\geq 150$  mm Hg and  $< 180$  mm Hg at randomisation are eligible for inclusion in the study. Untreated patients (if they are newly diagnosed or have not been treated with antihypertensive drugs for the 4 weeks prior to screening) must have msSBP  $\geq 150$  mm Hg and  $< 180$  mm Hg at screening and randomisation, whereas patients who have been treated with antihypertensive agents 4 weeks prior to screening must have msSBP  $\geq 140$  mm Hg and  $< 180$  mm Hg after 1 or 2 weeks of washout/placebo run-in and  $\geq 150$  mm Hg and  $< 180$  mm Hg at randomisation. All patients must have a PP  $> 60$  mm Hg at randomisation. Patients with malignant or severe hypertension, secondary causes of hypertension, history of atrial fibrillation or atrial flutter during the 3 months prior to screening, or active atrial fibrillation or atrial flutter on electrocardiogram, history of CV disease (e.g., myocardial infarction) during 12 months prior to screening, and



1  
2  
3 evidence of severe renal impairment (e.g., estimated glomerular filtration rate [eGFR] <30  
4 ml/min/1.73 m<sup>2</sup>) are excluded – boxes 1 and 2 summarise the inclusion and exclusion  
5 criteria, respectively. Patients have to provide a written informed consent before starting any  
6 study-related procedures.  
7  
8  
9

### 10 11 **The study objectives and endpoints** 12

13  
14 The primary objective of the study is to demonstrate the superiority of a LCZ696-based  
15 treatment regimen over an olmesartan-based treatment regimen in reducing mean CASP after  
16 12 weeks of treatment. Superiority testing is also planned for the key secondary efficacy  
17 assessment, i.e. the reduction in mean central aortic PP (CAPP) after 12 weeks of treatment,  
18 and other secondary efficacy assessments such as mean CASP and CAPP after 52 weeks of  
19 treatment. Mean aPWV, msSBP, msDBP, msPP, mean ambulatory (ma) BP, maPP, and  
20 MAP will also be measured after 12 and 52 weeks of treatment.  
21  
22  
23  
24  
25

26  
27 Exploratory assessments comparing the two treatments after 12 and 52 weeks of treatment  
28 include pulse wave analysis (PWA) variables such as augmentation index (AIx),  
29 augmentation pressure, PP amplification ratio, duration of left ventricle (LV) ejection, and  
30 time to wave reflection; reduction in ma central (mac) BP, macMAP, and macPP; plasma  
31 biomarkers including NT-proBNP and urinary cyclic guanosine monophosphate  
32 (cGMP)/creatinine ratio and other biomarkers related to hypertension.  
33  
34  
35  
36  
37

### 38 39 **Haemodynamic measurements** 40

41 The SphygmoCor X-CEL System (AtCor Medical, Sydney, Australia) is being used to non-  
42 invasively derive the ascending aortic pressure waveform from the brachial waveform using  
43 a validated generalised transfer function (GTF).<sup>23</sup> A properly sized BP cuff is linked to a  
44 computer and software and the CASP, CAPP, augmentation pressure, and AIx are  
45 determined from the analysis of waveform by the system software.  
46  
47  
48  
49

50  
51 The SphygmoCor X-CEL system also measures the carotid-femoral aPWV, as the speed of  
52 the arterial pressure waveform as it travels through the descending aorta to the femoral  
53 artery, which is detected from simultaneously measured carotid and femoral arterial pulses.  
54 The carotid pulse is detected by applanation tonometry using a high-fidelity pressure  
55  
56  
57  
58  
59  
60

1  
2  
3 transducer (Millar Instruments, Houston, TX), while the femoral pulse is detected using a  
4 partially inflated blood pressure cuff wrapped around the upper thigh. The distance travelled  
5 by the pulse wave is captured by making physical measurements on the body surface  
6 according to the manufacturer's recommendations. This new brachial cuff-based device with  
7 an individualised sub-diastolic cuff pressure has recently been validated against the  
8 SphygmoCor device (AtCor Medical) using the classical radial tonometry-based  
9 methodology, and provides an operator-independent method to assess systolic pressure and  
10 aortic waveform comparable with the existing validated tonometric-based methods.<sup>24</sup>  
11 Measurements using SphygmoCor X-CEL system will be performed at baseline,  
12 randomisation, Week 12 or at the time of early discontinuation prior to Week 12, Week 52,  
13 or at the time of early discontinuation between Week 12 and Week 52.  
14  
15  
16  
17  
18  
19  
20  
21  
22  
23

24 The 24-hour maCAP and maPWA will be monitored using the oscillometric device, Mobil-  
25 O-Graph (IEM, Stolberg, Germany) with integrated ARC solver algorithms (Austrian  
26 Institute of Technology, Vienna, Austria). The traditional Mobil-O-Graph ambulatory blood  
27 pressure monitoring (ABPM) device has been available for more than a decade and through  
28 several product generations.<sup>25-28</sup> The actual blood pressure measuring unit was validated  
29 according to the British Hypertension Society (BHS) and the European Society of  
30 Hypertension (ESH) recommendations.<sup>25,27</sup> The method equipped with a GTF to derive aortic  
31 pressure waveforms<sup>29</sup> is based on brachial readings acquired in the course of the  
32 conventional pressure measurement at diastolic level.  
33  
34  
35  
36  
37  
38  
39

40 During the signal acquisition procedure, the received raw signals are separated into single  
41 waves and checked for their plausibility by means of extreme values and corresponding  
42 wavelengths using a cross-correlation approach. Poor waveforms are removed from further  
43 processing. After applying the GTF to each single waveform, the procedure is repeated. After  
44 final coherence verification, the quality judgment of grade '1' states that at least 80% of the  
45 waveforms were found to be eligible for further processing, while grades '2' and '3'  
46 represent a  $\geq 50\%$  and  $< 50\%$  valid waveforms, respectively.<sup>30</sup>  
47  
48  
49  
50  
51  
52  
53

54 Surrogates derived by this technique have been validated against solid-state catheter  
55 measurements and/or compared with non-invasive readings (e.g., tonometry,  
56 echocardiography) for aortic pressures,<sup>30-33</sup> wave reflections,<sup>34</sup> or aPWV.<sup>35,36</sup> However,  
57  
58  
59  
60

1  
2  
3 potential clinical usefulness has been demonstrated recently.<sup>37-39</sup> Furthermore, feasibility<sup>36</sup>  
4 and reproducibility<sup>40</sup> of cuff-based maPWA measurements have been reported. With respect  
5 to legal issues, the Mobil-O-Graph maPWA monitor with integrated ARC solver algorithms  
6 holds approvals from CE, FDA, and JPAL (amongst others).  
7  
8  
9

### 10 11 **Safety assessments**

12  
13  
14 Safety and tolerability assessments include regular monitoring and recording of all adverse  
15 events (AEs) and concomitant medications or significant non-drug therapies. Evaluations of  
16 routine blood chemistries, blood counts with white cell differential and urine analyses,  
17 physical examinations, electrocardiograms (ECGs), and monitoring of vital signs will be  
18 performed at regular intervals.  
19  
20  
21  
22

### 23 24 **Statistical analysis plan**

25  
26 A sample size of 183 completers per group is targeted, which is calculated based on the  
27 primary efficacy variable, change from baseline in mean CASP at 12 weeks, assuming a  
28 standard deviation of 19 mm Hg. The sample size is calculated to ensure a power of 90% to  
29 detect statistical significance for the comparison of LCZ696-based treatment regimen with  
30 the olmesartan-based treatment regimen in assessing the superiority at the Week 12 endpoint,  
31 under the alternative hypothesis that the treatment difference is 6.5 mmHg at a two-sided  
32 significance level of 0.05. Assuming a 15% dropout rate, the total targeted sample size to be  
33 randomised is 432 patients (216 per group). The primary variable at the Week 12 endpoint  
34 will be analysed using a two-way analysis of covariance (ANCOVA), with treatment and  
35 region as factors and the baseline as a covariate. Mean CAPP at the Week 12 endpoint will  
36 be analysed using the same type of ANCOVA model used for the primary efficacy analysis.  
37  
38  
39  
40  
41  
42  
43  
44  
45  
46  
47  
48  
49  
50  
51  
52  
53  
54  
55  
56  
57  
58  
59  
60

## DISCUSSION

Hypertension in patients over 60 years is often difficult to control because of age-associated adverse changes in vascular structure and function, especially arterial stiffening and the resulting changes in aortic haemodynamics. The majority of elderly patients present with features of arterial stiffening, notably ISH, disrupted circadian BP variation, a non-dipping or early morning riser phenotype of hypertension, and orthostatic hypertension. Moreover, compared with younger people, elderly patients are usually characterised with augmented aortic systolic and pulse pressures relative to brachial pressure, associated with diminished aortic-brachial pressure amplification resulting in the 'true' elevation of brachial systolic and pulse pressures. In turn, the elevated aortic and brachial pulse pressures that result from increased cardiac work to overcome the increased characteristic impedance of the aorta due to its age-related stiffening, causes an increased predisposition to left ventricular hypertrophy, myocardial ischaemia and heart failure.

Our hypothesis is that the ARNI LCZ696 provides a novel approach to neurohormonal modulation by concomitantly enhancing the NP system and suppressing the RAAS. Owing to the effects of enhanced NPs and RAAS inhibition, LCZ696 is anticipated to improve aortic stiffness, reduce characteristic impedance, and improve central haemodynamics. NPs inhibit the production and action of vasoconstrictor peptides, inhibit sympathetic outflow, and protect against excess salt and water retention.<sup>41</sup> NPs also inhibit cardiac growth or the development of compensatory cardiac hypertrophy and regulate CV function.<sup>41</sup> Inhibition of sympathetic tone might be beneficial in controlling morning surge in BP in elderly patients with hypertension.<sup>42,43</sup> Additionally, suppressing the RAAS offers the potential for many similar actions on CV structure and function as well as favourable effects on microcirculatory haemodynamics as evidenced by observations of reduced albuminuria and renal protection beyond what might have been anticipated from BP reduction alone.

It has already been demonstrated that LCZ696 provides superior reductions in msSBP and msDBP versus valsartan in an 8-week study including 1328 patients with mild-to-moderate hypertension. In addition, LCZ696 significantly reduced maSBP versus valsartan (between-treatment difference: LCZ696 200 mg versus valsartan 160 mg,  $-3.23$  mm Hg, 95% CI  $-5.70$  to  $-0.75$ ; LCZ696 400 mg versus valsartan 320 mg,  $-5.14$  mm Hg, 95% CI  $-7.70$  to  $-2.59$ ).

1  
2  
3 However, there was no significant treatment difference in maDBP reductions, thereby  
4 providing evidence of improvements in PP with LCZ696 versus valsartan. These findings are  
5 consistent with improvements in large artery function. Furthermore, BP control rates were  
6 significantly higher with LCZ696 200 mg than with 160 mg valsartan (46% [78/168] versus  
7 33% [54/163],  $p = 0.0147$ ). Importantly, in these studies, unlike the vasopeptidase inhibitor  
8 omapatrilat, LCZ696 was generally well tolerated without an incidence of angio-oedema  
9 during 8 weeks of treatment.<sup>21</sup>  
10  
11

12 The reported improvements in PP suggest the potential for LCZ696 to protect more  
13 effectively than the existing BP-lowering agents from several consequences of ISH and  
14 vascular stiffness, such as stroke and diastolic heart failure. However, in the study by Ruilope  
15 et al<sup>21</sup> CAP, central haemodynamics and arterial stiffness were not assessed, precluding a  
16 meticulous assessment of the mechanisms underpinning the superior antihypertensive  
17 properties of LCZ696.  
18  
19

20 In the PARAMETER study, the measurement of CAP should more accurately assess the  
21 loading conditions on the LV, myocardium, coronary arteries, cerebral vasculature, and  
22 therefore theoretically CAP should provide a basis for more effective protection against CV  
23 target organ damage and events compared with brachial pressures. In this regard, even in  
24 normotensive individuals, measurement of aortic BP enhances the ability to predict the target  
25 organ changes.<sup>44</sup>  
26  
27

28 The PARAMETER study was initiated in December 2012 with a novel design to evaluate  
29 central haemodynamics in elderly patients with ISH and a widened PP at 12 and 52 weeks of  
30 treatment with LCZ696 or ARB olmesartan. If the changes in CASP at 12 weeks (acute  
31 haemodynamic effect) are larger than that in SBP, this would support the hypothesis that  
32 LCZ696 has the potential to favourably impact aortic haemodynamics and improve  
33 ventricular-vascular coupling in elderly patients with aged aortas and ISH. Treatment  
34 differences in PWV at 52 weeks would further support a direct beneficial effect of LCZ696  
35 on aortic stiffness due to structural changes, independent of MAP, as both treatment groups  
36 will be titrated to achieve similar BP control. The overall effect of LCZ696 on maBP  
37 (maSBP, maDBP and maPP), 24-hour BP variability (standard deviation, covariance), and  
38 circadian BP rhythms (nocturnal dipping status and morning surge) will also be assessed in  
39  
40  
41  
42  
43  
44  
45  
46  
47  
48  
49  
50  
51  
52  
53  
54  
55  
56  
57  
58  
59  
60

1  
2  
3 comparison with olmesartan. The study targets randomisation of 432 patients and final  
4 results are expected in 2015. We acknowledge the limitations of this study which is designed  
5 to look at surrogate markers rather than major cardiovascular outcomes, nevertheless, this is  
6 important to establish if there are differential effects of drugs therapies on surrogate  
7 outcomes of cardiovascular disease to justify and impact on the design of subsequent phase  
8 III studies assessing the potential of LCZ696 for enhanced cardiovascular disease and stroke  
9 prevention in elderly patients with ISH.  
10  
11

12  
13  
14  
15  
16 In addition to the PARAMETER study, the efficacy and safety of LCZ696 is being evaluated  
17 in related studies, for example, in comparison with olmesartan in elderly patients with mild-  
18 to-moderate hypertension, in patients with systolic hypertension and in patients with systolic  
19 hypertension who did not respond to olmesartan. Although it is hypothesised in the  
20 PARAMETER study that LCZ696 will be more effective at lowering both central aortic and  
21 brachial BP compared with olmesartan, it is also recognised that other agents may need to be  
22 added to reach recommended BP goals in the elderly patients with systolic hypertension.  
23 Both calcium channel blockers (CCBs, usually amlodipine) and diuretics are the most  
24 commonly used antihypertensive agents in combination with RAAS blockade for patients  
25 failing to achieve their BP goal with RAAS blockade monotherapy. Besides being very  
26 effective, such combination therapies of specific antihypertensive classes may also improve  
27 safety and tolerability. For example, addition of ARBs to CCBs has been shown to reduce the  
28 peripheral oedema associated with amlodipine monotherapy.<sup>45</sup> Similarly, diuretic-induced  
29 hypokalaemia has been shown to be attenuated when RAAS blockade is combined with  
30 diuretic therapy.<sup>46</sup> To further evaluate such combination therapies with LCZ696, the BP-  
31 lowering efficacy, safety and tolerability is being evaluated in combination with amlodipine  
32 in patients with mild-to-moderate hypertension who were non-responsive to amlodipine and  
33 in patients with systolic hypertension. There are also other trials investigating the efficacy  
34 and safety of LCZ696 in patients with severe hypertension and in patients with renal  
35 impairment.  
36  
37  
38  
39  
40  
41  
42  
43  
44  
45  
46  
47  
48  
49  
50  
51

52  
53 In summary, the PARAMETER study will evaluate mechanisms associated with BP-  
54 lowering in elderly patients with an aged CV system as evidenced by systolic hypertension  
55 and a widened PP. The study will define whether LCZ696, a first-in-class ARNI is more  
56  
57  
58  
59  
60

1  
2  
3 effective in lowering CASP and CAPP than the ARB olmesartan and also explore whether  
4 this effect is related to a BP-independent reduction in arterial stiffening, suggesting a novel  
5 mechanism to target systolic hypertension, a major and increasingly important unmet  
6 therapeutic need in the management of hypertension in elderly patients.  
7  
8  
9

## 10 11 **ACKNOWLEDGEMENTS**

12  
13  
14 We acknowledge Dr. Sreedevi Boggarapu (Novartis Healthcare Pvt. Ltd., Hyderabad, India)  
15 for medical writing and editorial support. We also thank all the clinical investigators and  
16 study coordinators at the participating centres and all the patients who participate in the  
17 study.  
18  
19  
20

## 21 22 **CONFLICTS OF INTERESTS**

23  
24 BW, JC, and KK have received honoraria from Novartis for consulting and presentations at  
25 scientific symposia. DZ, PC, AH, PB, and JZ are employees of Novartis and are thus eligible  
26 for Novartis stock and stock options.  
27  
28  
29

## 30 31 **FUNDING STATEMENT**

32  
33 This study is funded by Novartis Pharma AG, Basel, Switzerland.  
34  
35  
36  
37  
38  
39  
40  
41  
42  
43  
44  
45  
46  
47  
48  
49  
50  
51  
52  
53  
54  
55  
56  
57  
58  
59  
60



## Reference List

1. Kearney PM, Whelton M, Reynolds K, et al. Global burden of hypertension: analysis of worldwide data. *Lancet* 2005;365:217-23.
2. Lawes CM, Vander HS, Rodgers A. Global burden of blood-pressure-related disease, 2001. *Lancet* 2008;371:1513-8.
3. Lionakis N, Mendrinou D, Sanidas E, et al. Hypertension in the elderly. *World J Cardiol* 2012;4:135-47.
4. Arguedas JA, Perez MI, Wright JM. Treatment blood pressure targets for hypertension. *Cochrane Database of Systematic Reviews* 2009.
5. Franklin SS, Jacobs MJ, Wong ND, et al. Predominance of isolated systolic hypertension among middle-aged and elderly US hypertensives: analysis based on National Health and Nutrition Examination Survey (NHANES) III. *Hypertension* 2001;37:869-74.
6. Vasani RS, Beiser A, Seshadri S, et al. Residual lifetime risk for developing hypertension in middle-aged women and men: The Framingham Heart Study. *JAMA* 2002;287:1003-10.
7. Palatini P, Casiglia E, Gasowski J, et al. Arterial stiffness, central hemodynamics, and cardiovascular risk in hypertension. *Vasc Health Risk Manag* 2011;7:725-39.
8. Vlachopoulos C, Aznaouridis K, O'Rourke MF, et al. Prediction of cardiovascular events and all-cause mortality with central haemodynamics: a systematic review and meta-analysis. *Eur Heart J* 2010;31:1865-71.
9. Mitchell GF, Vasani RS, Keyes MJ, et al. Pulse pressure and risk of new-onset atrial fibrillation. *JAMA* 2007;297:709-15.
10. Waldstein SR, Rice SC, Thayer JF, et al. Pulse pressure and pulse wave velocity are related to cognitive decline in the Baltimore Longitudinal Study of Aging. *Hypertension* 2008;51:99-104.
11. Ford ML, Tomlinson LA, Chapman TP, et al. Aortic stiffness is independently associated with rate of renal function decline in chronic kidney disease stages 3 and 4. *Hypertension* 2010;55:1110-5.
12. Manisty CH, Hughes AD. Meta-analysis of the comparative effects of different classes of antihypertensive agents on brachial and central systolic blood pressure, and augmentation index. *Br J Clin Pharmacol* 2013;75:79-92.
13. Roman MJ, Devereux RB, Kizer JR, et al. Central pressure more strongly relates to vascular disease and outcome than does brachial pressure: the Strong Heart Study. *Hypertension* 2007;50:197-203.



14. Roman MJ, Okin PM, Kizer JR, et al. Relations of central and brachial blood pressure to left ventricular hypertrophy and geometry: the Strong Heart Study. *J Hypertens* 2010;28:384-8.
15. Wang KL, Cheng HM, Chuang SY, et al. Central or peripheral systolic or pulse pressure: which best relates to target organs and future mortality? *J Hypertens* 2009;27:461-7.
16. Jankowski P, Kawecka-Jaszcz K, Czarnicka D, et al. Ascending aortic, but not brachial blood pressure-derived indices are related to coronary atherosclerosis. *Atherosclerosis* 2004;176:151-5.
17. Ostergren J, Poulter NR, Sever PS, et al. The Anglo-Scandinavian Cardiac Outcomes Trial: blood pressure-lowering limb: effects in patients with type II diabetes. *J Hypertens* 2008;26:2103-11.
18. Williams B, Lacy PS, Thom SM, et al. Differential impact of blood pressure-lowering drugs on central aortic pressure and clinical outcomes: principal results of the Conduit Artery Function Evaluation (CAFE) study. *Circulation* 2006;113:1213-25.
19. Mitchell GF, Izzo JL, Jr., et al. Omapatrilat reduces pulse pressure and proximal aortic stiffness in patients with systolic hypertension: results of the conduit hemodynamics of omapatrilat international research study. *Circulation* 2002;105:2955-61.
20. Veelken R, Schmieder RE. Neutral endopeptidase inhibition: the potential of a new therapeutic approach in cardiovascular disease evolves. *J Hypertens* 2002;20:599-603.
21. Ruilope LM, Dukat A, Bohm M, et al. Blood-pressure reduction with LCZ696, a novel dual-acting inhibitor of the angiotensin II receptor and neprilysin: a randomised, double-blind, placebo-controlled, active comparator study. *Lancet* 2010;375:1255-66.
22. Solomon SD, Zile M, Pieske B, et al. The angiotensin receptor neprilysin inhibitor LCZ696 in heart failure with preserved ejection fraction: a phase 2 double-blind randomised controlled trial. *Lancet* 2012;380:1387-95.
23. Gallagher D, Adji A, O'Rourke MF. Validation of the transfer function technique for generating central from peripheral upper limb pressure waveform. *Am J Hypertens* 2004;17:1059-67.
24. Butlin M, Qasem A, Avolio AP. Estimation of central aortic pressure waveform features derived from the brachial cuff volume displacement waveform. *Conf Proc IEEE Eng Med Biol Soc* 2012;2012:2591-4.
25. Franssen PM, Imholz BP. Evaluation of the Mobil-O-Graph new generation ABPM device using the ESH criteria. *Blood Press Monit* 2010;15:229-31.
26. Jones CR, Taylor K, Chowienczyk P, et al. A validation of the Mobil O Graph (version 12) ambulatory blood pressure monitor. *Blood Press Monit* 2000;5:233-8.

- 1  
2  
3 27. Wei W, Tolle M, Zidek W, et al. Validation of the mobil-O-Graph: 24 h-blood pressure  
4 measurement device. *Blood Press Monit* 2010;15:225-8.  
5
- 6 28. Westhoff TH, Straub-Hohenbleicher H, Schmidt S, et al. Convenience of ambulatory blood  
7 pressure monitoring: comparison of different devices. *Blood Press Monit* 2005;10:239-42.  
8
- 9 29. Wassertheurer S, Mayer C, Breitenecker F. Modeling arterial and left ventricular coupling  
10 for non-invasive measurements. *Simulation Modelling Practice and Theory* 2008;16:988-  
11 97.  
12
- 13 30. Wassertheurer S, Kropf J, Weber T, et al. A new oscillometric method for pulse wave  
14 analysis: comparison with a common tonometric method. *J Hum Hypertens* 2010;24:498-  
15 504.  
16
- 17 31. Nunan D, Wassertheurer S, Lasserson D, et al. Assessment of central haemodynamics  
18 from a brachial cuff in a community setting. *BMC Cardiovasc Disord* 2012;12:48.  
19
- 20 32. Weber T, Wassertheurer S, Rammer M, et al. Validation of a brachial cuff-based method  
21 for estimating central systolic blood pressure. *Hypertension* 2011;58:825-32.  
22
- 23 33. Weiss W, Gohlisch C, Harsch-Gladisch C, et al. Oscillometric estimation of central blood  
24 pressure: validation of the Mobil-O-Graph in comparison with the SphygmoCor device.  
25 *Blood Press Monit* 2012;17:128-31.  
26
- 27 34. Hametner B, Wassertheurer S, Kropf J, et al. Wave reflection quantification based on  
28 pressure waveforms alone--methods, comparison, and clinical covariates. *Comput Methods*  
29 *Programs Biomed* 2013;109:250-9.  
30
- 31 35. Hametner B, Wassertheurer S, Kropf J, et al. Oscillometric estimation of aortic pulse wave  
32 velocity: comparison with intra-aortic catheter measurements. *Blood Press Monit*  
33 2013;18:173-6.  
34
- 35 36. Luzardo L, Lujambio I, Sottolano M, et al. 24-h ambulatory recording of aortic pulse wave  
36 velocity and central systolic augmentation: a feasibility study. *Hypertens Res* 2012;35:980-  
37 7.  
38
- 39 37. Reppel M, Franzen K, Bode F, et al. Central hemodynamics and arterial stiffness during the  
40 finals of the world cup soccer championship 2010. *Int J Cardiol* 2013;166:627-32.  
41
- 42 38. Weber T, Wassertheurer S, Rammer M, et al. Wave reflections, assessed with a novel  
43 method for pulse wave separation, are associated with end-organ damage and clinical  
44 outcomes. *Hypertension* 2012;60:534-41.  
45
- 46 39. Weber T, Wassertheurer S, O'Rourke MF, et al. Pulsatile hemodynamics in patients with  
47 exertional dyspnea: potentially of value in the diagnostic evaluation of suspected heart  
48 failure with preserved ejection fraction. *J Am Coll Cardiol* 2013;61:1874-83.  
49  
50  
51  
52  
53  
54  
55  
56  
57  
58  
59  
60

- 1  
2  
3  
4  
5  
6  
7  
8  
9  
10  
11  
12  
13  
14  
15  
16  
17  
18  
19  
20  
21  
22  
23  
24  
25  
26  
27  
28  
29  
30  
31  
32  
33  
34  
35  
36  
37  
38  
39  
40  
41  
42  
43  
44  
45  
46  
47  
48  
49  
50  
51  
52  
53  
54  
55  
56  
57  
58  
59  
60
40. Protogerou AD, Argyris A, Nasothimiou E, et al. Feasibility and reproducibility of noninvasive 24-h ambulatory aortic blood pressure monitoring with a brachial cuff-based oscillometric device. *Am J Hypertens* 2012;25:876-82.
  41. Levin ER, Gardner DG, Samson WK. Natriuretic peptides. *N Engl J Med* 1998;339:321-8.
  42. London GM, Weiss YA, Pannier BP, et al. Tilt test in essential hypertension. Differential responses in heart rate and vascular resistance. *Hypertension* 1987;10:29-34.
  43. Okada Y, Galbreath MM, Shibata S, et al. Morning Blood Pressure Surge is Associated with Arterial Stiffness and Sympathetic Baroreflex Sensitivity in Hypertensive Seniors. *Am J Physiol Heart Circ Physiol* 2013.
  44. Booyesen HL, Norton GR, Maseko MJ, et al. Aortic, but not brachial blood pressure category enhances the ability to identify target organ changes in normotensives. *J Hypertens* 2013;31:1124-30.
  45. Chazova IE, Dongre N, Vigdorchik AV. Real-life safety and effectiveness of amlodipine/valsartan combination in the treatment of hypertension. *Adv Ther* 2011;28:134-49.
  46. Palmer BF. Improving BP control with combined renin-angiotensin system blockade and thiazide diuretics in hypertensive patients with diabetes mellitus or kidney disease. *Am J Cardiovasc Drugs* 2008;8:9-14.

Figure 1. Study design



HCTZ, hydrochlorothiazide; msDBP, mean sitting diastolic blood pressure; msSBP, mean sitting systolic blood pressure

review only

## Box 1.

**Inclusion criteria**

- Patients with essential hypertension aged  $\geq 60$  years
- Either untreated or treated with antihypertensive agents, and who have msSBP  $\geq 150$  and  $< 180$  mm Hg at randomisation are eligible to be included.
  - Untreated patients (if they are newly diagnosed or have not been treated with antihypertensive drugs for the 4 weeks prior to screening) must have msSBP  $\geq 150$  mm Hg and  $< 180$  mm Hg at screening and randomisation.
  - Patients who have been treated with antihypertensive drugs during 4 weeks prior to screening must have msSBP  $\geq 140$  mm Hg and  $< 180$  mm Hg after 1 or 2 weeks of washout/placebo run-in and  $\geq 150$  mm Hg and  $< 180$  mm Hg at randomisation.
  - Patients must have a difference in msSBP of within  $\pm 15$  mm Hg between randomisation and the visit preceding randomisation.
- All patients must have a PP  $> 60$  mmHg at randomisation.
- Patients who comply with all study requirements and demonstrate good medication compliance ( $\geq 80\%$  compliance rate) during the amlodipine run-in period

Only

**Box 2.****Exclusion criteria**

- Malignant or severe hypertension or secondary causes of hypertension
- History of atrial fibrillation or atrial flutter during 3 months prior to screening or active atrial fibrillation or atrial flutter on electrocardiogram during 12 months prior to screening
- History of cardiovascular disease (e.g., myocardial infarction) during the 12 months prior to screening
- Existing angina pectoris requiring pharmacological therapy (other than patients on a stable dose of oral or topical nitrates)
- Type 1 or type 2 diabetes mellitus not well controlled based on the investigator's clinical judgment
- Previous or current diagnosis of heart failure (NYHA Class II-IV), cardiac abnormalities such as Second or third degree atrioventricular block without a pacemaker, or malignancy
- Evidence of severe renal impairment (e.g., estimated glomerular filtration rate [eGFR] <30 ml/min/1.73 m<sup>2</sup>)
- Laboratory abnormalities such as serum potassium >5.5 mmol/L
- Known active liver disease or cirrhosis or evidence of hepatic disease
- Patients requiring any drug treatment that could affect BP
- Women of child bearing potential unless using highly effective methods of contraception during dosing

1  
2  
3  
4  
5  
6  
7  
8  
9  
10  
11  
12  
13  
14  
15  
16  
17  
18  
19  
20  
21  
22  
23  
24  
25  
26  
27  
28  
29  
30  
31  
32  
33  
34  
35  
36  
37  
38  
39  
40  
41  
42  
43  
44  
45  
46  
47  
48  
49  
50  
51  
52  
53  
54  
55  
56  
57  
58  
59  
60

For peer review only

1  
2  
3 **Rationale and study design of the Prospective comparison of Angiotensin Receptor**  
4 **neprilysin inhibitor with Angiotensin receptor blocker MEasuring arterial sTiffness in the**  
5 **eldERly (PARAMETER) study**  
6  
7  
8

9  
10 Bryan Williams,<sup>1</sup> John R. Cockcroft,<sup>2</sup> Kazuomi Kario,<sup>3</sup> Dion H. Zappe,<sup>4</sup> Pamela Cardenas,<sup>4</sup>  
11  
12 Allen Hester,<sup>4</sup> Patrick Brunel,<sup>5</sup> Jack Zhang<sup>4</sup>  
13

14  
15 <sup>1</sup>Department of Cardiovascular Sciences, University College of London, London, UK;

16  
17 <sup>2</sup>Department of Cardiology, University of Cardiff, Wales, UK; <sup>3</sup>Jichi Medical School, Tochigi,  
18  
19 Japan; <sup>4</sup>Novartis Pharmaceuticals Corporation, East Hanover, New Jersey, USA; <sup>5</sup>Novartis  
20  
21 Pharma AG, Basel, Switzerland  
22  
23

24  
25 **Corresponding Author:**

26 Bryan Williams MD FRCP FAHA FESC

27  
28 Professor of Medicine

29  
30 Director; National Institute for Health Research (NIHR) University College London Hospitals  
31 Biomedical Research Centre

32  
33 Institute of Cardiovascular Science

34  
35 University College London

36  
37 170 Tottenham Court Road

38  
39 W1T 7HA

40  
41 London

42  
43 United Kingdom

44  
45 Phone number: +442031082357

46  
47 E-mail [bryan.williams@ucl.ac.uk](mailto:bryan.williams@ucl.ac.uk)  
48

49 **Key words:** arterial stiffness, central aortic systolic pressure, isolated systolic hypertension,  
50  
51 pulse pressure, LCZ696, elderly  
52

53  
54 **Word count:** 3920 words excluding title page, abstract, references, tables, and figures  
55  
56  
57  
58  
59  
60



**ABSTRACT**

**IntroductionBackground:** Hypertension in elderly people is characterised by elevated systolic blood pressure (SBP) and increased pulse pressure (PP), which indicate large artery ageing and stiffness. LCZ696, a first-in-class angiotensin receptor neprilysin inhibitor (ARNI), is ~~currently~~ being developed ~~to treat for the treatment of~~ hypertension and heart failure. The Prospective comparison of Angiotensin Receptor neprilysin inhibitor with Angiotensin receptor blocker MEasuring arterial sTiffness in the eldERly (PARAMETER) study will assess the efficacy of LCZ696 versus olmesartan on aortic stiffness and central aortic haemodynamics.

**MethodsDesign and Analysismethods:** In this 52-week multicentre study, patients with hypertension aged  $\geq 60$  years with a mean seated (ms) SBP  $\geq 150$ – $<180$ mmHg and a PP  $>60$ mmHg will be randomised to once-daily LCZ696 200mg or olmesartan 20mg for 4 weeks, followed by a forced-titration to double the initial doses for the next 8 weeks. At 12–24 weeks, if the BP target has not been attained (msSBP  $<140$ mmHg and ms diastolic blood pressure  $<90$  mmHg), amlodipine (2.5–5mg) and subsequently hydrochlorothiazide (6.25–25mg) can be added. The primary and secondary endpoints are changes from baseline in central aortic systolic pressure (CASP) and central aortic PP (CAPP) at Week 12, respectively. Other secondary endpoints are the changes in CASP and CAPP at Week 52.

**Statistical analysis plan:** A sample size of 432 randomised patients is estimated to ensure a power of 90% to assess the superiority of LCZ696 over the olmesartan at Week 12 in the change from baseline of mean CASP, assuming a standard deviation of 19mmHg, the difference of 6.5mmHg and a 15% dropout rate. The primary variable will be analysed using a two-way analysis of covariance.

**Ethics and DisseminationProgress and implications:** The study was initiated in December 2012 and final results are expected in 2015. The results of this study will impact the design of future phase III studies assessing cardiovascular protection.

**Clinical trials identifier:** EUDract number 2012-002899-14 and ClinicalTrials.gov NCT01692301.

1  
2  
3 **Key words:** arterial stiffness, central aortic systolic pressure, isolated systolic hypertension,  
4 pulse pressure, LCZ696, elderly  
5  
6  
7  
8  
9

## 10 **Strengths and Weaknesses of this Study**

### 11 **Strengths:**

- 12 • This is a randomized controlled trial of a new class of drug therapy (angiotensin  
13 receptor neprilysin inhibitor – ARNI) for hypertension versus a comparator that  
14 blocks only the angiotensin receptor – this will inform on the added value of  
15 neprilysin inhibition in the context of systolic hypertension;  
16
- 17 • The study incorporates a detailed clinical experimental medicine mechanistic  
18 study that will interrogate the actions of this new drug class on vascular  
19 haemodynamics and function;  
20
- 21 • The study evaluates the a novel treatment approach for a major unmet clinical  
22 need, i.e. systolic hypertension  
23  
24  
25  
26

### 27 **Weaknesses**

- 28 • The study has inadequate statistical power to assess the impact of the  
29 interventions on major clinical outcomes beyond blood pressure and vascular  
30 haemodynamics and function.  
31  
32  
33  
34  
35  
36  
37  
38  
39  
40  
41  
42  
43  
44  
45  
46  
47  
48  
49  
50  
51  
52  
53  
54  
55  
56  
57  
58  
59  
60

## INTRODUCTION

Hypertension accounts for 9.4 million cardiovascular (CV) deaths annually worldwide and is affecting more than two-thirds of people aged  $\geq 65$  years, an age group that is growing globally.<sup>1,2</sup> The treatment of hypertension has been shown to reduce the risk of morbidity and mortality associated with elevated blood pressure (BP) including stroke, ischaemic heart disease, heart failure, chronic kidney disease and possibly cognitive decline.<sup>3</sup> Despite the availability of multiple drug classes with different mechanisms of action, hypertension, especially systolic blood pressure (SBP), remains inadequately controlled.<sup>4,5,6</sup>

The SBP usually increases from childhood throughout the life, while diastolic BP (DBP) remains relatively constant or decreases beyond 50 to 60 years of age. ~~This indicates that the worldwide burden of hypertension beyond 50 to 60 years is mostly due to systolic hypertension. Furthermore, the progressive increase in SBP and decrease or no change in DBP widens pulse pressure (PP), and results in the development of isolated systolic hypertension (ISH), which is the predominant form of hypertension in elderly patients. The National Health and Nutrition Examination Survey (NHANES) III reported that the prevalence of ISH was 87% in elderly patients with hypertension.<sup>5</sup> Furthermore, the Framingham Heart Study (FHS) reported almost a 90% lifetime risk of developing ISH in normotensive people reaching the age of 65 years and who survived for another 20 to 25 years.<sup>6</sup>~~

The changing patterns of BP throughout the life reflect different pathologies. In the young, hypertension is predominantly due to an increased DBP and mean arterial pressure (MAP), as a result of a relative increase in cardiac output and/or increased peripheral vascular resistance.<sup>7</sup> On the other hand, advancing age, beyond mid-life, is associated with an increased stiffness of large elastic arteries, especially the aorta. Arterial stiffening adversely affects the characteristic impedance of the aorta, requiring more cardiac work and raising SBP as more stroke volume is delivered during systole owing to the increased pulse wave velocity (PWV). DBP also decreases due to less elastic recoil leading to reduced flow, thus increasing PP independent of any changes in MAP. PWV been shown to be an independent predictor of CV outcomes, including mortality,<sup>8</sup> myocardial infarction (MI),<sup>8</sup> stroke,<sup>8</sup> atrial fibrillation,<sup>9</sup> cognitive decline<sup>10</sup> and renal dysfunction<sup>11</sup> and more specifically aortic PWV

1  
2  
3 (aPWV), a robust measure of aortic arterial stiffness, has been shown to predict the adverse  
4 CV outcomes.<sup>7</sup>  
5  
6

7  
8 Another consequence of arterial ageing and stiffening is that the amplification of SBP and PP  
9 from the aortic root to the peripheral arteries diminishes. In a healthy arterial system, central  
10 aortic systolic pressure (CASP) and PP are amplified as they move towards the periphery,  
11 such that the measured brachial systolic pressure is typically around 10–mm Hg higher than  
12 the corresponding aortic root pressure<sup>12</sup>. With ageing, this amplification is reduced because  
13 of the increased PWV and the increase in the early wave reflection resulting in the measured  
14 brachial SBP and PP becoming closer to the corresponding aortic root pressures. Some  
15 studies have suggested that central pressures may have a closer correlation than peripheral  
16 BP with end organ damage<sup>13-15</sup> and CV risk,<sup>15</sup> such as extent of coronary atherosclerosis,  
17 carotid intima-media thickness, left ventricular hypertrophy, and left ventricular diastolic  
18 function.<sup>14,16,17</sup>  
19  
20  
21  
22  
23  
24  
25  
26  
27

28 These observations raise the intriguing question as to whether treatments used to lower blood  
29 pressure could differentially affect aortic relative to brachial pressures and also arterial  
30 stiffness per se. It has been demonstrated that BP-lowering drugs can have marked  
31 differential effects on central aortic pressure (CAP) and brachial BP.<sup>18</sup> These effects mimic a  
32 functional anti-ageing effect in terms of their impact on wave-form morphology, and greater  
33 reduction in central pressures relative to brachial pressures. Intriguingly, the beta-blockers, a  
34 drug class which was least effective at lowering aortic pressure also appeared to be the least  
35 effective class at reducing the risk of stroke in elderly patients.<sup>18</sup> This supports the concept  
36 that the more effective lowering of aortic relative to brachial pressure may be clinically  
37 important.  
38  
39  
40  
41  
42  
43  
44  
45

46 Despite the findings cited above, controlling SBP remains the most important unmet need in  
47 the clinical management of hypertension. The rise in SBP and PP with ageing appears to be  
48 strongly related to arterial stiffening and increased impedance to flow through a stiff aorta.  
49 This suggests that the treatments targeting aortic stiffening and reducing characteristic  
50 impedance would be effective particularly at reducing systolic pressure. Early proof of this  
51 concept came from the studies with omapatrilat, a vasopeptidase inhibitor that  
52 simultaneously inhibits neprilysin and angiotensin-converting enzyme (ACE). Neprilysin  
53  
54  
55  
56  
57  
58  
59  
60

1  
2  
3 inhibition enhances natriuretic peptide (NP) levels by blocking their degradation. NP has  
4 vasodilating actions, which could reduce aortic stiffness, improve characteristic impedance  
5 and thereby reduce SBP and PP. Studies with omapatrilat show greater improvements in  
6 aortic characteristic impedance compared with enalapril, beyond the effects of BP-lowering  
7 after 12 weeks of therapy.<sup>19</sup> This benefit on aortic function was also associated with  
8 impressive data on SBP and PP lowering in patients with hypertension. ~~Despite this~~  
9 ~~considerable promise, omapatrilat was withdrawn due to safety concerns owing to increased~~  
10 ~~incidences of angio-oedema associated with the ACE inhibitor component, which was~~  
11 ~~seemingly potentiated by the neprilysin inhibition.~~

12  
13 Although omapatrilat was withdrawn due to safety concerns, Nevertheless, a proof of  
14 concept was established for concomitant inhibition of neprilysin and renin-angiotensin-  
15 aldosterone system (RAAS) with the potential to be an attractive treatment strategy to  
16 improve aortic haemodynamics. ~~Furthermore, there might be other benefits of neprilysin~~  
17 ~~inhibition in the setting of hypertension, beyond its vasodilator action.~~ Increased NP levels  
18 also promote natriuresis and reduce sympathetic tone, together with antiproliferative and  
19 antihypertrophic effects, and inhibition of aldosterone secretion.<sup>20</sup> Alongside, suppression of  
20 RAAS would be complementary to neprilysin inhibition, which attenuates vasoconstriction,  
21 reduces sodium and water retention and also inhibits the development of CV hypertrophy and  
22 adverse re-modelling.

23  
24 Recently LCZ696, a first-in-class angiotensin receptor neprilysin inhibitor (ARNI), has been  
25 developed. LCZ696 delivers systemic exposure to a neprilysin inhibitor prodrug, AHU377  
26 (which rapidly converts into active LBQ657), and an angiotensin receptor blocker (ARB),  
27 valsartan. LCZ696 at 100, 200 and 400 mg once daily, in patients with mild-to-moderate  
28 essential hypertension, resulted in greater BP reductions than corresponding doses of  
29 valsartan alone (160 and 320 mg) and was well tolerated.<sup>21</sup> LCZ696 compared with valsartan  
30 was effective especially at reducing brachial SBP and PP. Furthermore, in patients with heart  
31 failure with preserved ejection fraction, LCZ696 has shown to reduce N-terminal-pro B-type  
32 natriuretic peptide (NT-proBNP), a biomarker of left ventricular (LV) wall stress, to a greater  
33 extent than valsartan alone at 12 weeks and was well tolerated.<sup>22</sup>

1  
2  
3 Thus, the big challenge in hypertension treatment is to reduce the SBP, and the available  
4 evidence suggests that this could be achieved by improving the haemodynamic performance  
5 of the ageing aorta. The Prospective comparison of Angiotensin Receptor neprilysin inhibitor  
6 with Angiotensin receptor blocker MEasuring arterial sTiffness in the eldERly  
7 (PARAMETER) study is designed to compare the effect of LCZ696 with olmesartan, an  
8 ARB, on CASP, other measures of central aortic haemodynamics and arterial stiffness, and  
9 ambulatory blood pressures in elderly patients with an elevated brachial SBP and a widened  
10 PP. The widened PP was chosen as an entry criteria as being indicative of aortic stiffening  
11 and advanced aortic ageing. The objective is to determine whether the ARNI LCZ696 can  
12 reverse some of the effects of arterial ageing in elderly patients with systolic hypertension,  
13 and thereby improve aortic pressures and haemodynamics. The study was initiated in  
14 December 2012 and the final results are expected in 2015. This manuscript describes the  
15 design, objectives and pre-specified analysis plan for the PARAMETER study.  
16  
17  
18  
19  
20  
21  
22  
23  
24  
25  
26  
27  
28  
29  
30  
31  
32  
33  
34  
35  
36  
37  
38  
39  
40  
41  
42  
43  
44  
45  
46  
47  
48  
49  
50  
51  
52  
53  
54  
55  
56  
57  
58  
59  
60

## METHODS

### Study design

The PARAMETER study is a 52-week, multicentre, randomised, double-blind, active-controlled, parallel-group study, involving 51 centres from 13 countries (Europe 47%, South America 14%, Asia 19% and US 20% — see online supplement for list of local investigators and participating centres). The study includes a screening period, a placebo run-in, and an initial double-blind treatment period of 12 weeks with LCZ696 monotherapy, followed by a double-blind extension of 40 weeks, during which add-on therapy is allowed to reach the BP treatment goal. Patients will be randomised to receive either once-daily LCZ696 200 mg or olmesartan 20 mg for 4 weeks, followed by a forced-titration to double the initial doses for the next 8 weeks. After 12 weeks, patients with uncontrolled BP (mean sitting [ms] SBP >140 mm Hg and/or msDBP >90 mm Hg) will be prescribed amlodipine (2.5–5 mg) and then hydrochlorothiazide (6.25–25 mg) as needed, at an interval of 4 weeks up to Week 24 (Figure 1). This study has been approved by all relevant ethics committees. The study is registered as EUDract number 2012-002899-14 and on ClinicalTrials.gov under the code NCT01692301.

### Study participants

Elderly patients (aged  $\geq 60$  years) with essential hypertension (either untreated or treated with antihypertensive agents) and patients who have msSBP  $\geq 150$  mm Hg and  $< 180$  mm Hg at randomisation are eligible for inclusion in the study. Untreated patients (if they are newly diagnosed or have not been treated with antihypertensive drugs for the 4 weeks prior to screening) must have msSBP  $\geq 150$  mm Hg and  $< 180$  mm Hg at screening and randomisation, whereas patients who have been treated with antihypertensive agents 4 weeks prior to screening must have msSBP  $\geq 140$  mm Hg and  $< 180$  mm Hg after 1 or 2 weeks of washout/placebo run-in and  $\geq 150$  mm Hg and  $< 180$  mm Hg at randomisation. All patients must have a PP  $> 60$  mm Hg at randomisation. Patients with malignant or severe hypertension, secondary causes of hypertension, history of atrial fibrillation or atrial flutter during the 3 months prior to screening, or active atrial fibrillation or atrial flutter on electrocardiogram, history of CV disease (e.g., myocardial infarction) during 12 months prior to screening, and



1  
2  
3 evidence of severe renal impairment (e.g., estimated glomerular filtration rate [eGFR] <30  
4 ml/min/1.73 m<sup>2</sup>) are excluded – boxes 1 and 2 summarise the inclusion and exclusion  
5 criteria, respectively. Patients have to provide a written informed consent before starting any  
6 study-related procedures.  
7  
8  
9

### 10 11 **The study objectives and endpoints**

12  
13  
14 The primary objective of the study is to demonstrate the superiority of a LCZ696-based  
15 treatment regimen over an olmesartan-based treatment regimen in reducing mean CASP after  
16 12 weeks of treatment. Superiority testing is also planned for the key secondary efficacy  
17 assessment, i.e. the reduction in mean central aortic PP (CAPP) after 12 weeks of treatment,  
18 and other secondary efficacy assessments such as mean CASP and CAPP after 52 weeks of  
19 treatment. Mean aPWV, msSBP, msDBP, msPP, mean ambulatory (ma) BP, maPP, and  
20 MAP will also be measured after 12 and 52 weeks of treatment.  
21  
22  
23  
24  
25

26  
27 Exploratory assessments comparing the two treatments after 12 and 52 weeks of treatment  
28 include pulse wave analysis (PWA) variables such as augmentation index (AIx),  
29 augmentation pressure, PP amplification ratio, duration of left ventricle (LV) ejection, and  
30 time to wave reflection; reduction in ma central (mac) BP, macMAP, and macPP; plasma  
31 biomarkers including NT-proBNP and urinary cyclic guanosine monophosphate  
32 (cGMP)/creatinine ratio and other biomarkers related to hypertension.  
33  
34  
35  
36  
37

### 38 39 **Haemodynamic measurements**

40  
41 The SphygmoCor X-CEL System (AtCor Medical, Sydney, Australia) is being used to non-  
42 invasively derive the ascending aortic pressure waveform from the brachial waveform using  
43 a validated generalised transfer function (GTF).<sup>23</sup> A properly sized BP cuff is linked to a  
44 computer and software and the CASP, CAPP, augmentation pressure, and AIx are  
45 determined from the analysis of waveform by the system software.  
46  
47  
48  
49

50  
51 The SphygmoCor X-CEL system also measures the carotid-femoral aPWV, as the speed of  
52 the arterial pressure waveform as it travels through the descending aorta to the femoral  
53 artery, which is detected from simultaneously measured carotid and femoral arterial pulses.  
54 The carotid pulse is detected by applanation tonometry using a high-fidelity pressure  
55  
56  
57  
58  
59  
60



1  
2  
3 transducer (Millar Instruments, Houston, TX), while the femoral pulse is detected using a  
4 partially inflated blood pressure cuff wrapped around the upper thigh. The distance travelled  
5 by the pulse wave is captured by making physical measurements on the body surface  
6 according to the manufacturer's recommendations. This new brachial cuff-based device with  
7 an individualised sub-diastolic cuff pressure has recently been validated against the  
8 SphygmoCor device (AtCor Medical) using the classical radial tonometry-based  
9 methodology, and provides an operator-independent method to assess systolic pressure and  
10 aortic waveform comparable with the existing validated tonometric-based methods.<sup>24</sup>  
11 Measurements using SphygmoCor X-CEL system will be performed at baseline,  
12 randomisation, Week 12 or at the time of early discontinuation prior to Week 12, Week 52,  
13 or at the time of early discontinuation between Week 12 and Week 52.  
14  
15  
16  
17  
18  
19  
20  
21  
22  
23

24 The 24-hour maCAP and maPWA will be monitored using the oscillometric device, Mobil-  
25 O-Graph (IEM, Stolberg, Germany) with integrated ARC solver algorithms (Austrian  
26 Institute of Technology, Vienna, Austria). The traditional Mobil-O-Graph ambulatory blood  
27 pressure monitoring (ABPM) device has been available for more than a decade and through  
28 several product generations.<sup>25-28</sup> The actual blood pressure measuring unit was validated  
29 according to the British Hypertension Society (BHS) and the European Society of  
30 Hypertension (ESH) recommendations.<sup>25,27</sup> The method equipped with a GTF to derive aortic  
31 pressure waveforms<sup>29</sup> is based on brachial readings acquired in the course of the  
32 conventional pressure measurement at diastolic level.  
33  
34  
35  
36  
37  
38  
39  
40

41 During the signal acquisition procedure, the received raw signals are separated into single  
42 waves and checked for their plausibility by means of extreme values and corresponding  
43 wavelengths using a cross-correlation approach. Poor waveforms are removed from further  
44 processing. After applying the GTF to each single waveform, the procedure is repeated. After  
45 final coherence verification, the quality judgment of grade '1' states that at least 80% of the  
46 waveforms were found to be eligible for further processing, while grades '2' and '3'  
47 represent a  $\geq 50\%$  and  $< 50\%$  valid waveforms, respectively.<sup>30</sup>  
48  
49  
50  
51  
52  
53

54 Surrogates derived by this technique have been validated against solid-state catheter  
55 measurements and/or compared with non-invasive readings (e.g., tonometry,  
56 echocardiography) for aortic pressures,<sup>30-33</sup> wave reflections,<sup>34</sup> or aPWV.<sup>35,36</sup> However,  
57  
58  
59  
60

1  
2  
3 potential clinical usefulness has been demonstrated recently.<sup>37-39</sup> Furthermore, feasibility<sup>36</sup>  
4 and reproducibility<sup>40</sup> of cuff-based maPWA measurements have been reported. With respect  
5 to legal issues, the Mobil-O-Graph maPWA monitor with integrated ARC solver algorithms  
6 holds approvals from CE, FDA, and JPAL (amongst others).  
7  
8  
9

### 10 11 **Safety assessments**

12  
13  
14 Safety and tolerability assessments include regular monitoring and recording of all adverse  
15 events (AEs) and concomitant medications or significant non-drug therapies. Evaluations of  
16 routine blood chemistries, blood counts with white cell differential and urine analyses,  
17 physical examinations, electrocardiograms (ECGs), and monitoring of vital signs will be  
18 performed at regular intervals.  
19  
20  
21  
22

### 23 24 **Statistical analysis plan**

25  
26 A sample size of 183 completers per group is targeted, which is calculated based on the  
27 primary efficacy variable, change from baseline in mean CASP at 12 weeks, assuming a  
28 standard deviation of 19 mm Hg. The sample size is calculated to ensure a power of 90% to  
29 detect statistical significance for the comparison of LCZ696-based treatment regimen with  
30 the olmesartan-based treatment regimen in assessing the superiority at the Week 12 endpoint,  
31 under the alternative hypothesis that the treatment difference is 6.5 mmHg at a two-sided  
32 significance level of 0.05. Assuming a 15% dropout rate, the total targeted sample size to be  
33 randomised is 432 patients (216 per group). The primary variable at the Week 12 endpoint  
34 will be analysed using a two-way analysis of covariance (ANCOVA), with treatment and  
35 region as factors and the baseline as a covariate. Mean CAPP at the Week 12 endpoint will  
36 be analysed using the same type of ANCOVA model used for the primary efficacy analysis.  
37  
38  
39  
40  
41  
42  
43  
44  
45  
46  
47  
48  
49  
50  
51  
52  
53  
54  
55  
56  
57  
58  
59  
60

## DISCUSSION

Hypertension in patients over 60 years is often difficult to control because of age-associated adverse changes in vascular structure and function, especially arterial stiffening and the resulting changes in aortic haemodynamics. The majority of elderly patients present with features of arterial stiffening, notably ISH, disrupted circadian BP variation, a non-dipping or early morning riser phenotype of hypertension, and orthostatic hypertension. Moreover, compared with younger people, elderly patients are usually characterised with augmented aortic systolic and pulse pressures relative to brachial pressure, associated with diminished aortic-brachial pressure amplification resulting in the 'true' elevation of brachial systolic and pulse pressures. In turn, the elevated aortic and brachial pulse pressures that result from increased cardiac work to overcome the increased characteristic impedance of the aorta due to its age-related stiffening, causes an increased predisposition to left ventricular hypertrophy, myocardial ischaemia and heart failure.

Our hypothesis is that the ARNI LCZ696 provides a novel approach to neurohormonal modulation by concomitantly enhancing the NP system and suppressing the RAAS. Owing to the effects of enhanced NPs and RAAS inhibition, LCZ696 is anticipated to improve aortic stiffness, reduce characteristic impedance, and improve central haemodynamics. NPs inhibit the production and action of vasoconstrictor peptides, inhibit sympathetic outflow, and protect against excess salt and water retention.<sup>41</sup> NPs also inhibit cardiac growth or the development of compensatory cardiac hypertrophy and regulate CV function.<sup>41</sup> Inhibition of sympathetic tone might be beneficial in controlling morning surge in BP in elderly patients with hypertension.<sup>42,43</sup> Additionally, suppressing the RAAS offers the potential for many similar actions on CV structure and function as well as favourable effects on microcirculatory haemodynamics as evidenced by observations of reduced albuminuria and renal protection beyond what might have been anticipated from BP reduction alone.

It has already been demonstrated that LCZ696 provides superior reductions in msSBP and msDBP versus valsartan in an 8-week study including 1328 patients with mild-to-moderate hypertension. In addition, LCZ696 significantly reduced maSBP versus valsartan (between-treatment difference: LCZ696 200 mg versus valsartan 160 mg,  $-3.23$  mm Hg, 95% CI  $-5.70$  to  $-0.75$ ; LCZ696 400 mg versus valsartan 320 mg,  $-5.14$  mm Hg, 95% CI  $-7.70$  to  $-2.59$ ).

1  
2  
3 However, there was no significant treatment difference in maDBP reductions, thereby  
4 providing evidence of improvements in PP with LCZ696 versus valsartan. These findings are  
5 consistent with improvements in large artery function. Furthermore, BP control rates were  
6 significantly higher with LCZ696 200 mg than with 160 mg valsartan (46% [78/168] versus  
7 33% [54/163],  $p = 0.0147$ ). Importantly, in these studies, unlike the vasopeptidase inhibitor  
8 omapatrilat, LCZ696 was generally well tolerated without an incidence of angio-oedema  
9 during 8 weeks of treatment.<sup>21</sup>  
10  
11

12 The reported improvements in PP suggest the potential for LCZ696 to protect more  
13 effectively than the existing BP-lowering agents from several consequences of ISH and  
14 vascular stiffness, such as stroke and diastolic heart failure. However, in the study by Ruilope  
15 et al<sup>21</sup> CAP, central haemodynamics and arterial stiffness were not assessed, precluding a  
16 meticulous assessment of the mechanisms underpinning the superior antihypertensive  
17 properties of LCZ696.  
18  
19

20 In the PARAMETER study, the measurement of CAP should more accurately assess the  
21 loading conditions on the LV, myocardium, coronary arteries, cerebral vasculature, and  
22 therefore theoretically CAP should provide a basis for more effective protection against CV  
23 target organ damage and events compared with brachial pressures. In this regard, even in  
24 normotensive individuals, measurement of aortic BP enhances the ability to predict the target  
25 organ changes.<sup>44</sup>  
26  
27

28 The PARAMETER study was initiated in December 2012 with a novel design to evaluate  
29 central haemodynamics in elderly patients with ISH and a widened PP at 12 and 52 weeks of  
30 treatment with LCZ696 or ARB olmesartan. If the changes in CASP at 12 weeks (acute  
31 haemodynamic effect) are larger than that in SBP, this would support the hypothesis that  
32 LCZ696 has the potential to favourably impact aortic haemodynamics and improve  
33 ventricular-vascular coupling in elderly patients with aged aortas and ISH. Treatment  
34 differences in PWV at 52 weeks would further support a direct beneficial effect of LCZ696  
35 on aortic stiffness due to structural changes, independent of MAP, as both treatment groups  
36 will be titrated to achieve similar BP control. The overall effect of LCZ696 on maBP  
37 (maSBP, maDBP and maPP), 24-hour BP variability (standard deviation, covariance), and  
38 circadian BP rhythms (nocturnal dipping status and morning surge) will also be assessed in  
39  
40  
41  
42  
43  
44  
45  
46  
47  
48  
49  
50  
51  
52  
53  
54  
55  
56  
57  
58  
59  
60

1  
2  
3  
4  
5  
6  
7  
8  
9  
10  
11  
12  
13  
14  
15  
16  
17  
18  
19  
20  
21  
22  
23  
24  
25  
26  
27  
28  
29  
30  
31  
32  
33  
34  
35  
36  
37  
38  
39  
40  
41  
42  
43  
44  
45  
46  
47  
48  
49  
50  
51  
52  
53  
54  
55  
56  
57  
58  
59  
60

comparison with olmesartan. The study targets randomisation of 432 patients and final results are expected in 2015. ~~W~~Although we acknowledge the limitations of this such a study which is designed to look at surrogate markers rather than major cardiovascular outcomes, and not at major CV clinical outcomes nevertheless, this is important to establish if there are differential effects of drugs therapies on surrogate outcomes of cardiovascular disease to justify and impact on the design of subsequent phase III studies assessing the potential of LCZ696 for enhanced cardiovascular disease and stroke prevention in elderly patients with ISH. we believe that t~~The results of the PARAMETER study, which investigates the effect of two treatment strategies on CAP and aortic stiffness which are predictors of the CV risk will impact the design of phase III studies assessing the CV protection potential of LCZ696 in elderly patients with ISH.~~

In addition to the PARAMETER study, the efficacy and safety of LCZ696 is being evaluated in related studies, for example, in comparison with olmesartan in elderly patients with mild-to-moderate hypertension, in patients with systolic hypertension and in patients with systolic hypertension who did not respond to olmesartan. Although it is hypothesised in the PARAMETER study that LCZ696 will be more effective at lowering both central aortic and brachial BP compared with olmesartan, it is also recognised that other agents may need to be added to reach recommended BP goals in the elderly patients with systolic hypertension. Both calcium channel blockers (CCBs, usually amlodipine) and diuretics are the most commonly used antihypertensive agents in combination with RAAS blockade for patients failing to achieve their BP goal with RAAS blockade monotherapy. Besides being very effective, such combination therapies of specific antihypertensive classes may also improve safety and tolerability. For example, addition of ARBs to CCBs has been shown to reduce the peripheral oedema associated with amlodipine monotherapy.<sup>45</sup> Similarly, diuretic-induced hypokalaemia has been shown to be attenuated when RAAS blockade is combined with diuretic therapy.<sup>46</sup> To further evaluate such combination therapies with LCZ696, the BP-lowering efficacy, safety and tolerability is being evaluated in combination with amlodipine in patients with mild-to-moderate hypertension who were non-responsive to amlodipine and in patients with systolic hypertension. There are also other trials investigating the efficacy and safety of LCZ696 in patients with severe hypertension and in patients with renal impairment.

1  
2  
3 In summary, the PARAMETER study will evaluate mechanisms associated with BP-  
4 lowering in elderly patients with an aged CV system as evidenced by systolic hypertension  
5 and a widened PP. The study will define whether LCZ696, a first-in-class ARNI is more  
6 effective in lowering CASP and CAPP than the ARB olmesartan and also explore whether  
7 this effect is related to a BP-independent reduction in arterial stiffening, suggesting a novel  
8 mechanism to target systolic hypertension, a major and increasingly important unmet  
9 therapeutic need in the management of hypertension in elderly patients.  
10  
11  
12  
13  
14  
15

## 16 **ACKNOWLEDGEMENTS**

17  
18 We acknowledge Dr. Sreedevi Boggarapu (Novartis Healthcare Pvt. Ltd., Hyderabad, India)  
19 for medical writing and editorial support. We also thank all the clinical investigators and  
20 study coordinators at the participating centres and all the patients who participate in the  
21 study.  
22  
23  
24  
25  
26

## 27 **CONFLICTS OF INTERESTS**

28  
29 BW, JC, and KK have received honoraria from Novartis for consulting and presentations at  
30 scientific symposia. DZ, PC, AH, PB, and JZ are employees of Novartis and are thus eligible  
31 for Novartis stock and stock options.  
32  
33  
34  
35

## 36 **FUNDING STATEMENT**

37  
38 This study is funded by Novartis Pharma AG, Basel, Switzerland.  
39  
40  
41  
42  
43  
44  
45  
46  
47  
48  
49  
50  
51  
52  
53  
54  
55  
56  
57  
58  
59  
60

## Reference List

1. Kearney PM, Whelton M, Reynolds K, et al. Global burden of hypertension: analysis of worldwide data. *Lancet* 2005;365:217-23.
2. Lawes CM, Vander HS, Rodgers A. Global burden of blood-pressure-related disease, 2001. *Lancet* 2008;371:1513-8.
3. Lionakis N, Mendrinou D, Sanidas E, et al. Hypertension in the elderly. *World J Cardiol* 2012;4:135-47.
4. Arguedas JA, Perez MI, Wright JM. Treatment blood pressure targets for hypertension. *Cochrane Database of Systematic Reviews* 2009.
5. Franklin SS, Jacobs MJ, Wong ND, et al. Predominance of isolated systolic hypertension among middle-aged and elderly US hypertensives: analysis based on National Health and Nutrition Examination Survey (NHANES) III. *Hypertension* 2001;37:869-74.
6. Vasani RS, Beiser A, Seshadri S, et al. Residual lifetime risk for developing hypertension in middle-aged women and men: The Framingham Heart Study. *JAMA* 2002;287:1003-10.
7. Palatini P, Casiglia E, Gasowski J, et al. Arterial stiffness, central hemodynamics, and cardiovascular risk in hypertension. *Vasc Health Risk Manag* 2011;7:725-39.
8. Vlachopoulos C, Aznaouridis K, O'Rourke MF, et al. Prediction of cardiovascular events and all-cause mortality with central haemodynamics: a systematic review and meta-analysis. *Eur Heart J* 2010;31:1865-71.
9. Mitchell GF, Vasani RS, Keyes MJ, et al. Pulse pressure and risk of new-onset atrial fibrillation. *JAMA* 2007;297:709-15.
10. Waldstein SR, Rice SC, Thayer JF, et al. Pulse pressure and pulse wave velocity are related to cognitive decline in the Baltimore Longitudinal Study of Aging. *Hypertension* 2008;51:99-104.
11. Ford ML, Tomlinson LA, Chapman TP, et al. Aortic stiffness is independently associated with rate of renal function decline in chronic kidney disease stages 3 and 4. *Hypertension* 2010;55:1110-5.
12. Manisty CH, Hughes AD. Meta-analysis of the comparative effects of different classes of antihypertensive agents on brachial and central systolic blood pressure, and augmentation index. *Br J Clin Pharmacol* 2013;75:79-92.
13. Roman MJ, Devereux RB, Kizer JR, et al. Central pressure more strongly relates to vascular disease and outcome than does brachial pressure: the Strong Heart Study. *Hypertension* 2007;50:197-203.



14. Roman MJ, Okin PM, Kizer JR, et al. Relations of central and brachial blood pressure to left ventricular hypertrophy and geometry: the Strong Heart Study. *J Hypertens* 2010;28:384-8.
15. Wang KL, Cheng HM, Chuang SY, et al. Central or peripheral systolic or pulse pressure: which best relates to target organs and future mortality? *J Hypertens* 2009;27:461-7.
16. Jankowski P, Kawecka-Jaszcz K, Czarnicka D, et al. Ascending aortic, but not brachial blood pressure-derived indices are related to coronary atherosclerosis. *Atherosclerosis* 2004;176:151-5.
17. Ostergren J, Poulter NR, Sever PS, et al. The Anglo-Scandinavian Cardiac Outcomes Trial: blood pressure-lowering limb: effects in patients with type II diabetes. *J Hypertens* 2008;26:2103-11.
18. Williams B, Lacy PS, Thom SM, et al. Differential impact of blood pressure-lowering drugs on central aortic pressure and clinical outcomes: principal results of the Conduit Artery Function Evaluation (CAFE) study. *Circulation* 2006;113:1213-25.
19. Mitchell GF, Izzo JL, Jr., Lacourciere Y, et al. Omapatrilat reduces pulse pressure and proximal aortic stiffness in patients with systolic hypertension: results of the conduit hemodynamics of omapatrilat international research study. *Circulation* 2002;105:2955-61.
20. Veelken R, Schmieder RE. Neutral endopeptidase inhibition: the potential of a new therapeutic approach in cardiovascular disease evolves. *J Hypertens* 2002;20:599-603.
21. Ruilope LM, Dukat A, Bohm M, et al. Blood-pressure reduction with LCZ696, a novel dual-acting inhibitor of the angiotensin II receptor and neprilysin: a randomised, double-blind, placebo-controlled, active comparator study. *Lancet* 2010;375:1255-66.
22. Solomon SD, Zile M, Pieske B, et al. The angiotensin receptor neprilysin inhibitor LCZ696 in heart failure with preserved ejection fraction: a phase 2 double-blind randomised controlled trial. *Lancet* 2012;380:1387-95.
23. Gallagher D, Adji A, O'Rourke MF. Validation of the transfer function technique for generating central from peripheral upper limb pressure waveform. *Am J Hypertens* 2004;17:1059-67.
24. Butlin M, Qasem A, Avolio AP. Estimation of central aortic pressure waveform features derived from the brachial cuff volume displacement waveform. *Conf Proc IEEE Eng Med Biol Soc* 2012;2012:2591-4.
25. Franssen PM, Imholz BP. Evaluation of the Mobil-O-Graph new generation ABPM device using the ESH criteria. *Blood Press Monit* 2010;15:229-31.
26. Jones CR, Taylor K, Chowienczyk P, et al. A validation of the Mobil O Graph (version 12) ambulatory blood pressure monitor. *Blood Press Monit* 2000;5:233-8.



- 1
  - 2
  - 3
  - 4
  - 5
  - 6
  - 7
  - 8
  - 9
  - 10
  - 11
  - 12
  - 13
  - 14
  - 15
  - 16
  - 17
  - 18
  - 19
  - 20
  - 21
  - 22
  - 23
  - 24
  - 25
  - 26
  - 27
  - 28
  - 29
  - 30
  - 31
  - 32
  - 33
  - 34
  - 35
  - 36
  - 37
  - 38
  - 39
  - 40
  - 41
  - 42
  - 43
  - 44
  - 45
  - 46
  - 47
  - 48
  - 49
  - 50
  - 51
  - 52
  - 53
  - 54
  - 55
  - 56
  - 57
  - 58
  - 59
  - 60
27. Wei W, Tolle M, Zidek W, et al. Validation of the mobil-O-Graph: 24 h-blood pressure measurement device. *Blood Press Monit* 2010;15:225-8.
28. Westhoff TH, Straub-Hohenbleicher H, Schmidt S, et al. Convenience of ambulatory blood pressure monitoring: comparison of different devices. *Blood Press Monit* 2005;10:239-42.
29. Wassertheurer S, Mayer C, Breitenecker F. Modeling arterial and left ventricular coupling for non-invasive measurements. *Simulation Modelling Practice and Theory* 2008;16:988-97.
30. Wassertheurer S, Kropf J, Weber T, et al. A new oscillometric method for pulse wave analysis: comparison with a common tonometric method. *J Hum Hypertens* 2010;24:498-504.
31. Nunan D, Wassertheurer S, Lasserson D, et al. Assessment of central haemodynamics from a brachial cuff in a community setting. *BMC Cardiovasc Disord* 2012;12:48.
32. Weber T, Wassertheurer S, Rammer M, et al. Validation of a brachial cuff-based method for estimating central systolic blood pressure. *Hypertension* 2011;58:825-32.
33. Weiss W, Gohlisch C, Harsch-Gladisch C, et al. Oscillometric estimation of central blood pressure: validation of the Mobil-O-Graph in comparison with the SphygmoCor device. *Blood Press Monit* 2012;17:128-31.
34. Hametner B, Wassertheurer S, Kropf J, et al. Wave reflection quantification based on pressure waveforms alone--methods, comparison, and clinical covariates. *Comput Methods Programs Biomed* 2013;109:250-9.
35. Hametner B, Wassertheurer S, Kropf J, et al. Oscillometric estimation of aortic pulse wave velocity: comparison with intra-aortic catheter measurements. *Blood Press Monit* 2013;18:173-6.
36. Luzardo L, Lujambio I, Sottolano M, et al. 24-h ambulatory recording of aortic pulse wave velocity and central systolic augmentation: a feasibility study. *Hypertens Res* 2012;35:980-7.
37. Reppel M, Franzen K, Bode F, et al. Central hemodynamics and arterial stiffness during the finals of the world cup soccer championship 2010. *Int J Cardiol* 2013;166:627-32.
38. Weber T, Wassertheurer S, Rammer M, et al. Wave reflections, assessed with a novel method for pulse wave separation, are associated with end-organ damage and clinical outcomes. *Hypertension* 2012;60:534-41.
39. Weber T, Wassertheurer S, O'Rourke MF, et al. Pulsatile hemodynamics in patients with exertional dyspnea: potentially of value in the diagnostic evaluation of suspected heart failure with preserved ejection fraction. *J Am Coll Cardiol* 2013;61:1874-83.

- 1
  - 2
  - 3
  - 4
  - 5
  - 6
  - 7
  - 8
  - 9
  - 10
  - 11
  - 12
  - 13
  - 14
  - 15
  - 16
  - 17
  - 18
  - 19
  - 20
  - 21
  - 22
  - 23
  - 24
  - 25
  - 26
  - 27
  - 28
  - 29
  - 30
  - 31
  - 32
  - 33
  - 34
  - 35
  - 36
  - 37
  - 38
  - 39
  - 40
  - 41
  - 42
  - 43
  - 44
  - 45
  - 46
  - 47
  - 48
  - 49
  - 50
  - 51
  - 52
  - 53
  - 54
  - 55
  - 56
  - 57
  - 58
  - 59
  - 60
40. Protogerou AD, Argyris A, Nasothimiou E, et al. Feasibility and reproducibility of noninvasive 24-h ambulatory aortic blood pressure monitoring with a brachial cuff-based oscillometric device. *Am J Hypertens* 2012;25:876-82.
41. Levin ER, Gardner DG, Samson WK. Natriuretic peptides. *N Engl J Med* 1998;339:321-8.
42. London GM, Weiss YA, Pannier BP, et al. Tilt test in essential hypertension. Differential responses in heart rate and vascular resistance. *Hypertension* 1987;10:29-34.
43. Okada Y, Galbreath MM, Shibata S, et al. Morning Blood Pressure Surge is Associated with Arterial Stiffness and Sympathetic Baroreflex Sensitivity in Hypertensive Seniors. *Am J Physiol Heart Circ Physiol* 2013.
44. Booyesen HL, Norton GR, Maseko MJ, et al. Aortic, but not brachial blood pressure category enhances the ability to identify target organ changes in normotensives. *J Hypertens* 2013;31:1124-30.
45. Chazova IE, Dongre N, Vighorchik AV. Real-life safety and effectiveness of amlodipine/valsartan combination in the treatment of hypertension. *Adv Ther* 2011;28:134-49.
46. Palmer BF. Improving BP control with combined renin-angiotensin system blockade and thiazide diuretics in hypertensive patients with diabetes mellitus or kidney disease. *Am J Cardiovasc Drugs* 2008;8:9-14.

Figure 1. Study design

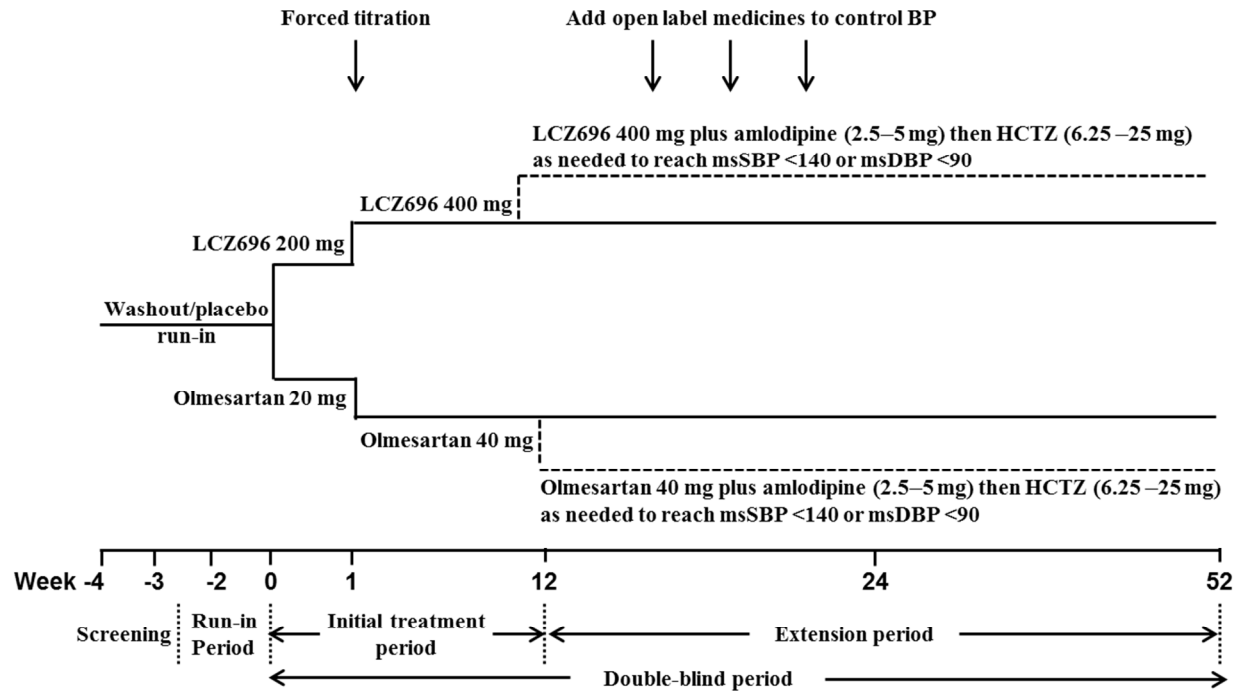

HCTZ, hydrochlorothiazide; msDBP, mean sitting diastolic blood pressure; msSBP, mean sitting systolic blood pressure

**Box 1.****Inclusion criteria**

- Patients with essential hypertension aged  $\geq 60$  years
- Either untreated or treated with antihypertensive agents, and who have msSBP  $\geq 150$  and  $< 180$  mm Hg at randomisation are eligible to be included.
  - Untreated patients (if they are newly diagnosed or have not been treated with antihypertensive drugs for the 4 weeks prior to screening) must have msSBP  $\geq 150$  mm Hg and  $< 180$  mm Hg at screening and randomisation.
  - Patients who have been treated with antihypertensive drugs during 4 weeks prior to screening must have msSBP  $\geq 140$  mm Hg and  $< 180$  mm Hg after 1 or 2 weeks of washout/placebo run-in and  $\geq 150$  mm Hg and  $< 180$  mm Hg at randomisation.
  - Patients must have a difference in msSBP of within  $\pm 15$  mm Hg between randomisation and the visit preceding randomisation.
- All patients must have a PP  $> 60$  mmHg at randomisation.
- Patients who comply with all study requirements and demonstrate good medication compliance ( $\geq 80\%$  compliance rate) during the amlodipine run-in period

Only

## Box 2.

**Exclusion criteria**

- Malignant or severe hypertension or secondary causes of hypertension
- History of atrial fibrillation or atrial flutter during 3 months prior to screening or active atrial fibrillation or atrial flutter on electrocardiogram during 12 months prior to screening
- History of cardiovascular disease (e.g., myocardial infarction) during the 12 months prior to screening
- Existing angina pectoris requiring pharmacological therapy (other than patients on a stable dose of oral or topical nitrates)
- Type 1 or type 2 diabetes mellitus not well controlled based on the investigator's clinical judgment
- Previous or current diagnosis of heart failure (NYHA Class II-IV), cardiac abnormalities such as Second or third degree atrioventricular block without a pacemaker, or malignancy
- Evidence of severe renal impairment (e.g., estimated glomerular filtration rate [eGFR] <30 ml/min/1.73 m<sup>2</sup>)
- Laboratory abnormalities such as serum potassium >5.5 mmol/L
- Known active liver disease or cirrhosis or evidence of hepatic disease
- Patients requiring any drug treatment that could affect BP
- Women of child bearing potential unless using highly effective methods of contraception during dosing

**Table: Principal Investigators and Participating Centers**

| Principal Investigator | Participating center                                                                |
|------------------------|-------------------------------------------------------------------------------------|
| Claudio R Majul        | CENUDIAB, Buenos Aires, Buenos Aires, C1440AAD                                      |
| Oscar Romano Montana   | DIM Clinica Privada, Buenos Aires, Buenos Aires, B1704ETD                           |
| Daniel Piskorz         | Sanatorio Britanico, Rosario, Santa Fe, S2000CXH                                    |
| Miguel Urina           | Fundacion BIOS, Barranquilla, Atlantico                                             |
| Alberto Cadena         | Clínica de La Costa, Barranquilla                                                   |
| Roland Erich Schmieder | KfH Nierenzentrum/CRC Clin.Research Center, Nuernberg, 90471                        |
| Juergen Scholze        | Med. Poliklinik der Humboldt-Univ./Campus Charité Mitte, Berlin, Germany, 10117     |
| Markus van der Giet    | Charité, Campus Benjamin Franklin, Berlin, Germany, 12200                           |
| Laia Sans              | Hospital del Mar, Barcelona, Cataluña, 08003                                        |
| Josefina Oliván        | Hospital Universitario Virgen Macarena, Sevilla, Andalucía, 41071                   |
| Carlos Calvo           | Hospital Clinico Universitario Santiago De Compostela, La Coruña, Galicia, 15706    |
| Jose Maria Pascual     | Hospital De Sagunto, Puerto de Sagunto, Comunidad Valenciana, 46520                 |
| Pablo Gomez            | Hospital General De Jerez De La Frontera, Jerez de La Frontera, Andalucía, 11407    |
| Luis Ruilope           | Hospital 12 de Octubre, Madrid, Madrid, 28041                                       |
| Jose L Zamorano        | Hospital Ramon Y Cajal, Madrid, Madrid, 28034                                       |
| Alejandro de la Sierra | Hospital Mutua de Terrassa, Terrassa, Cataluña, 08221                               |
| Silvia Narejos         | CAP Centelles, Centelles, Cataluña, 08540                                           |
| Gilles Chironi         | Hopital Europeen Georges Pompidou, Paris, France, 75015                             |
| Konstantinos Tsioufīs  | Ippokrateio General Hospital of Athens, Athens, Athens, 11525                       |
| Anastasios Spanos      | Athens Naval Hospital, Athens, Athens, 11526                                        |
| Michalis Doulas        | Ippokrateio General Hospital of Thessaloniki, Thessaloniki, Thessaloniki, 54642     |
| Stefano Taddei         | A.O.Univ.Pisana-Pres.Osp.S.Chiera-Univ.degli Studi, Pisa, PI, 56126                 |
| Maurizio Destro        | Pres.Osped.di Treviglio-Az.Osped.di Treviglio-Caravaggio, Treviglio, BG, 24047      |
| Lucio Mos              | P.O.Ospedale Civile S.Antonio ASS 4 Medio Friuli, San Daniele Del Friuli, UD, 33038 |
| Satoshi Hoshide        | Jichi Medical University Hospital, Shimotsuke-city, Tochigi, 329-0498               |

---

|    |                             |                                                                       |
|----|-----------------------------|-----------------------------------------------------------------------|
| 1  |                             |                                                                       |
| 2  |                             |                                                                       |
| 3  |                             |                                                                       |
| 4  | Haeyoung Lee                | Seoul National University Hospital, Seoul, Korea, 110 744             |
| 5  |                             |                                                                       |
| 6  | Sanghyun Ihm                | The Catholic University of Korea, Bucheon St.Mary Hospital, Bucheon,  |
| 7  |                             | Gyeonggi-do, 424-717                                                  |
| 8  | Zhanna Davidovna Kobalava   | Russian University of People Friendship, Moscow, Russia, 117292       |
| 9  |                             |                                                                       |
| 10 | Sergey Yurievich Martsevich | State Research Centre for Preventive Medicine, Moscow, Russia, 101990 |
| 11 |                             |                                                                       |
| 12 | Lydmila Ivanovna Pavlova    | Moscow Medical Academy n.a. Sechenov, Moscow, Russia, 119992          |
| 13 |                             |                                                                       |
| 14 | Victor Petrovich Kitsyshin  | St-Petersburg Dermatovenerologic dispensary ĳ 10, Saint-Petersburg,   |
| 15 |                             | 194021                                                                |
| 16 |                             |                                                                       |
| 17 | Elena Ivanovana Baranova    | State Pavlov Medical University, Saint-Petersburg, 197022             |
| 18 |                             |                                                                       |
| 19 | Alexandra Olegovna Konrady  | Institute of Cardiology and Endocrinol.n.a.after Almazov, Saint-      |
| 20 |                             | Petersburg, 197341                                                    |
| 21 |                             |                                                                       |
| 22 | Tatiana Vasilievna Treshkur | Institute of Cardiology and Endocrinol.n.a.after Almazov, Saint-      |
| 23 |                             | Petersburg, 197341                                                    |
| 24 |                             |                                                                       |
| 25 | Maria Evgenievna Mozheiko   | Yaroslavl Regional Hospital of Veterans of Wars, Yaroslavl, 150047    |
| 26 |                             |                                                                       |
| 27 | Kuan-Cheng Chang            | China Medical University Hospital (Taichung), Taichung, 40447         |
| 28 |                             |                                                                       |
| 29 | Chen-Huan Chen              | Taipei Veterans General Hospital, Taipei, Taiwan, 112                 |
| 30 |                             |                                                                       |
| 31 | Bing-Hsiean Tzeng           | Tri-Service General Hospital, Taipei, Taiwan, 114                     |
| 32 |                             |                                                                       |
| 33 | Harvey Resnick              | R/D Clinical Research, Inc., Lake Jackson, TX, 77566                  |
| 34 |                             |                                                                       |
| 35 | Gordon Sack                 | Med-Olam Clinical Research, Pasadena, TX, 77504                       |
| 36 |                             |                                                                       |
| 37 | Timothy R. Smith            | Mercy Health Research, St. Louis, MO, 63141                           |
| 38 |                             |                                                                       |
| 39 | Miguel Esteban Trevino      | Innovative Research of West Florida, Clearwater, FL, 33756            |
| 40 |                             |                                                                       |
| 41 | Andrea L. Phillips          | Phillips Medical Center, Jackson, MS, 39209                           |
| 42 |                             |                                                                       |
| 43 | Danny Hiroshi Sugimoto      | Cedar Crosse Research Center, Chicago, IL, 60607                      |
| 44 |                             |                                                                       |
| 45 | James I. Fidelholtz         | High Top Medical Research Center, Cincinnati, OH, 45224               |
| 46 |                             |                                                                       |
| 47 | Sidney Carlton Gorton       | Belzoni Clinical Research, Belzoni, MS, 39038                         |
| 48 |                             |                                                                       |
| 49 | Vicki E. Miller             | Texas Center for Drug Development, P.A., Houston, TX, 77081           |
| 50 |                             |                                                                       |
| 51 | James Mersey                | Model Clinical Research, Baltimore, MD, 21204                         |
| 52 |                             |                                                                       |
| 53 | Joseph L. Izzo              | Erie County Medical Center - Dept. of Cardiology, Buffalo, NY, 14215  |
| 54 |                             |                                                                       |
| 55 |                             |                                                                       |
| 56 |                             |                                                                       |
| 57 |                             |                                                                       |
| 58 |                             |                                                                       |
| 59 |                             |                                                                       |
| 60 |                             |                                                                       |

---

Figure 1. Study design

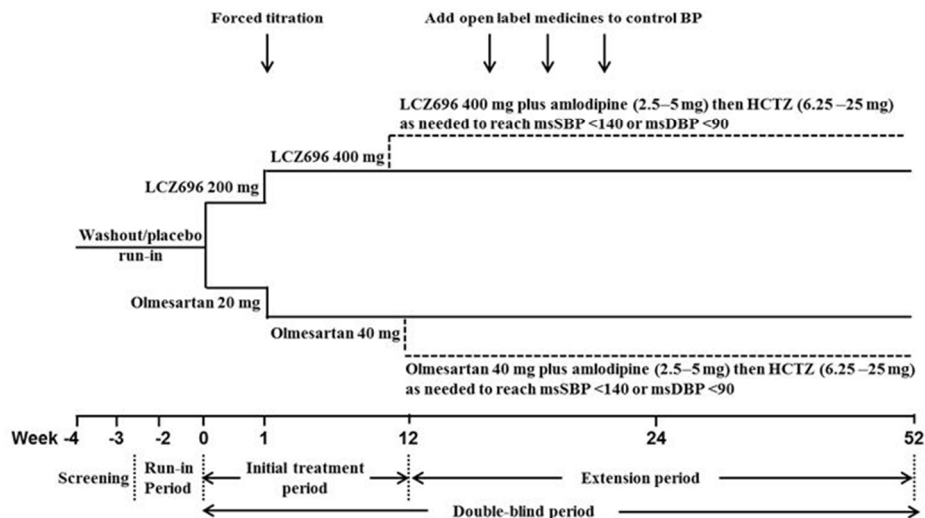

HCTZ, hydrochlorothiazide; msDBP, mean sitting diastolic blood pressure; msSBP, mean sitting systolic blood pressure

211x169mm (96 x 96 DPI)
